# Supplementary material
Source: ML conference proceedings conference paper supplement (https://openreview.net/forum?id=eumRwpgdMU)
Supplement: supplementary_material [file supplementary.pdf › aria_supplementary/supplementary.pdf]

---

# ARIA: Training Language Agents with Intention-Driven Reward Aggregation

---

Anonymous Author(s)

Affiliation

Address

email

## Abstract

Large language models (LLMs) have enabled agents to perform complex reasoning and decision-making through free-form language interactions. However, in open-ended language action environments (*e.g.*, negotiation or question-asking games), the action space can be formulated as a joint distribution over tokens, resulting in an extremely large and combinatorial action space. Sampling actions in such a space can lead to extreme reward sparsity, which brings large reward variance, hindering effective reinforcement learning (RL). To address this, we propose ARIA, a method that **Aggregates Rewards in Intention** space to enable efficient and effective language Agents training. ARIA aims to project natural language actions from the high-dimensional joint token distribution space into a low-dimensional intention space, where semantically similar actions are clustered and assigned shared rewards. This intention-aware reward aggregation reduces reward variance by densifying reward signals, fostering efficient and effective policy optimization. Extensive experiments demonstrate that ARIA not only significantly reduces gradient variance, but also delivers substantial performance gains of average 9.95% across four downstream tasks (*e.g.*, negotiation and text-based games), consistently outperforming strong offline and online RL baselines.

## 1 Introduction

Large language models (LLMs) have demonstrated strong capabilities in text comprehension and generation, enabling the development of autonomous agents that operate purely through natural language, commonly referred to as language agents [1; 2; 3]. Language agents are increasingly expected to interact with environments through language-driven actions to accomplish diverse tasks, such as web navigation [4; 5], text-based games [6; 7; 8], and negotiation [9; 10]. These tasks often require long-horizon planning and reasoning to achieve high-level goals, posing significant challenges for current language agents [11; 12; 13; 14; 15]. According to the structure of the action space, language agent tasks can be broadly categorized into *constrained action space tasks* and *open-ended language action tasks*. The former requires agents to perform actions from a predefined, discrete, and verifiable action set, where language serves as a template or command interface to structured environments [16; 17]. In contrast, the action space of *open-ended language action tasks* comprises free-form natural language utterances without strict validity constraints [18; 19]. These tasks introduce unique challenges: 1) Agents must generate diverse, context-sensitive language actions that dynamically influence other agents or the environment; 2) The open-endedness of language actions gives rise to a vast, unstructured, and highly strategic action space, requiring agents to reason, adapt, and optimize beyond fixed patterns. Given these challenges, we pose the following research question: *How can we enhance the performance of language agents in open-ended language action tasks?*

Reinforcement learning (RL) is widely used to enhance language agents in complex tasks by enabling them to learn through interaction and feedback [20; 21]. However, in open-ended language action settings, RL faces serious challenges due to **extremely sparse rewards** and an **exponentially large action space**, where actions are represented as token sequences. Given a vocabulary of size  $\mathcal{V}$  and an average sequence length  $\mathcal{L}$ , the action space scales as  $\mathcal{V}^{\mathcal{L}}$ , resulting in a combinatorial explosion. Existing methods often propagate feedback using averaging or decay heuristics. Yet these are inadequate for open-ended tasks, where sampling-based methods such as PPO [22] and REINFORCE [23] must search a vast, unstructured space under sparse and delayed rewards. This leads to **high variance in gradient estimation** and **inefficient policy optimization**.

To address these challenges, we propose **semantic projection**, which projects actions from the high-dimensional token space into a low-dimensional intention space, enabling reward aggregation across semantically equivalent actions. LLM agents’ actions often reflect underlying intentions, which are far fewer than token sequences. For example, the utterances “*I will concede first in order to encourage my opponent to compromise*” and “*By taking the initiative to compromise, I aim to prompt my counterpart to do the same.*” convey the same intention of prompting compromise through concession. By grouping such actions under shared intentions, we reduce the action space from  $\mathcal{V}^{\mathcal{L}}$  to intention space  $\mathcal{C}$ , where  $|\mathcal{C}| \ll |\mathcal{V}^{\mathcal{L}}|$ . This transformation reduces variance by densifying sparse rewards, and facilitates more efficient policy optimization.

Building on semantic projection, we propose ARIA, a method that **Aggregates Rewards in Intention** space for efficient training of language Agents. ARIA maps token-level actions into a task-specific intention space, enabling reward aggregation across semantically similar actions to stabilize and improve policy learning. To automatically construct the intention space  $\mathcal{C}$ , ARIA applies hierarchical clustering [24] over sentence embeddings and adaptively adjusts the clustering granularity. It then aggregates rewards for actions sharing similar intentions and uses REINFORCE [23] to optimize the policy over this compressed space. We evaluate ARIA on four language action tasks, including two single-agent settings (*Guess My City*, *20 Questions*) and two adversarial games (*Negotiation*, *Bargaining*). Experimental results show that: 1) ARIA significantly reduces reward variance, enabling more stable training and improved policy gradient efficiency; 2) It consistently outperforms strong offline and online RL baselines, achieving an average improvement of 9.95% across all tasks.

In summary, our key contributions are as follows: 1) We propose **semantic projection**, an intention-aware reward aggregation framework that projects actions from the high-dimensional token sequence space into a compact intention space, effectively mitigating reward sparsity in free-form language action tasks. 2) Built upon **semantic projection**, we design ARIA, a principled approach for training language agents with intention-driven reward aggregation, 3) We conduct extensive experiments on both single-agent and two-player adversarial tasks, showing that ARIA reduces reward variance, accelerates convergence, and outperforms state-of-the-art offline and online RL baselines.

## 2 Related Work

**Natural Language Agent Benchmark** Recent studies have introduced evaluation tasks for language agents requiring long-horizon planning and strategic reasoning in multi-turn, goal-driven settings, including social conversations [25], strategy games (e.g., *Werewolf*[26], *Avalon*[27]), economics-based scenarios (e.g., *bargaining*[18; 19], *negotiation*[19]), and text-based games (e.g., *Taboo*[28], *Guess My City*[8], *20 Questions*[8], *Ask-Guess*[29]). In this work, we focus on text-based games (*Guess My City*, *20 Questions*) and adversarial tasks (*Bargaining*, *Negotiation*), which demand dynamic strategy adaptation, balancing short- and long-term objectives, and complex reasoning, providing challenging benchmarks for evaluating LLM agents’ planning and decision-making abilities.

**Semantic Clustering** Semantic clustering partitions samples into categories based on semantic similarity, typically by first extracting representations (e.g., embeddings), then applying clustering algorithms such as  $k$ -means [30], hierarchical clustering [24], or DBSCAN [31]. In ARIA, actions are embedded and clustered into intentions using hierarchical clustering, which offers flexible post hoc granularity control and captures hierarchical semantic relations for coarse-to-fine strategy modeling.

**Training Language Agent with Reinforcement Learning** Language agents often face ambiguous goals and sparse rewards, requiring adaptive long-term planning [1; 2; 3], which challenges decision-

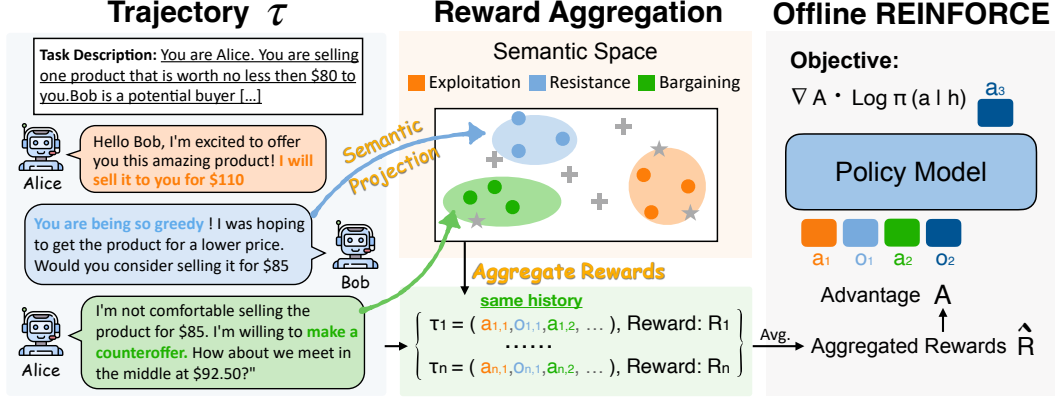

Figure 1: Illustration of ARIA. ARIA first lets agents interact to collect trajectories. Then it performs semantic projection and aggregates reward in the intention space, and finally updates the policy using the aggregated rewards.

making. Reinforcement learning (RL) provides a principled framework to address these challenges, with existing methods falling into two categories: offline methods [12; 28; 13; 14; 26], which pre-collect trajectories and apply post-processing (e.g., DPO [32], KTO [33]); and online methods [22; 20; 34], which alternate between sampling and policy updates. However, the high-dimensional action space in free-form language tasks exacerbates reward sparsity and variance, hindering RL training. To mitigate this, we adopt an offline RL setup with reward aggregation and REINFORCE [23], improving learning stability and efficiency.

### 3 Method

We illustrate an overview of ARIA in Figure 1. Building upon **semantic projection**, ARIA maps high-dimensional actions into intention space, thereby enabling reward aggregation. It then leverages the aggregated rewards to facilitate efficient offline REINFORCE optimization.

#### 3.1 Task Formulation

In this paper, we select two types of open-ended language action tasks, single-agent and two-agent adversarial games, as the testbed. We formulate the tasks as a partially observable Markov decision process POMDP  $\mathcal{M} = (\mathcal{S}, \mathcal{A}, \mathcal{O}, \mathcal{T}, \mathcal{R}, \gamma)$ , where  $\mathcal{S}$  is the global state,  $\mathcal{A}$  is the action space of natural language actions,  $\mathcal{O}$  is the observation,  $\mathcal{T}$  is the transition function,  $\mathcal{R}$  is the reward function, and  $\gamma$  is the discount factor. In the **single-agent** setting, an agent  $\mathcal{P}$  interacts with the environment by performing actions over time. At each step  $t$ , the agent receives an observation  $o_t$  under state  $s_t$  and maintains a history  $h_t = \{o_1, a_1, \dots, o_{t-1}, a_{t-1}, o_t\}$ . The agent then selects an action  $a_t \sim \pi_\theta(\cdot | h_t)$  conditioned on this history. The state  $s_t$  subsequently transitions to  $s_{t+1}$  according to the transition function  $T : \mathcal{S} \times \mathcal{A} \rightarrow \mathcal{S}$ . When  $s_t$  reaches the terminal condition, the environment returns a reward  $R$ . The objective of the agent is to maximize the expected cumulative reward at the end of the episode based on the policy  $\pi_\theta$ . In the **adversarial** setting, two players  $\mathcal{P} \in \{\mathcal{P}_1, \mathcal{P}_2\}$  take turns performing actions. In state  $s_t$ , player  $\mathcal{P}_i$  selects an action  $a_i \sim \pi_i(\cdot | h_t)$ , where  $h_t = \{o_1, a_1, \dots, o_{t-1}, a_{t-1}, o_t\}$  is the history of observations and actions, and  $o_t$  is derived from the state  $s_t$  and the opponent’s action  $a_t$ . The state  $s_t$  then transitions to  $s_{t+1}$  according to the transition function  $T : \mathcal{S} \times \mathcal{A} \rightarrow \mathcal{S}$ . When the terminal condition is met in  $s_t$ , the environment returns a reward  $R$  to each player. Each player  $\mathcal{P}_i$  aims to maximize the expected reward by the end of the episode based on their policy  $\pi_i$ .

#### 3.2 Reward Aggregation

In ARIA, we map both the actions and observations into a low-dimensional semantic space via clustering. Through this **semantic projection**, we reshape the rewards within this smaller intention space to enable better RL training.

**Semantic Embedding and Clustering** We begin by embedding each interaction instance  $x \in \mathcal{A} \cup \mathcal{O}$  using an embedder  $e$ , where  $x$  can represent either an action  $a$  or an observation  $o$ , producing the embedding vector  $e(x)$ . Next, we apply **Hierarchical Agglomerative Clustering** [35] to the embedding vectors, operating at an optimal granularity level  $k$ , which is determined through reward-oriented granularity selection as described in §3.3. A cluster label  $c_k(x)$  is then assigned to instance  $x$ <sup>1</sup>. Specifically, for each step  $t$ , we map the cluster label to each action and observation, denoting  $\tilde{a}_t = c_k(a)$  and  $\tilde{o}_t = c_k(o)$ . Consequently, we obtain a cluster label sequence  $\tilde{h}_t = \{c_k(a_1), c_k(o_1), \dots, c_k(a_{t-1}), c_k(o_{t-1})\}$ .

**Reward Aggregation** Let  $c(\tau) = \{c_k(a_1), c_k(o_1), \dots, c_k(a_T), c_k(o_T)\}$  denote the labeled sequence of trajectory  $\tau$  and  $R$  denote the reward. First, we have the return at  $t$  step as discounted reward with coefficient  $\gamma$ , i.e.,  $R(h_t, a_t) = \gamma^{T-t} R$ . Then, we calculate the aggregated return as  $\tilde{R}(\tilde{h}_t, \tilde{a}_t) = \frac{1}{|\mathcal{D}_{\tilde{h}_t, \tilde{a}_t}|} \sum_{\tau \in \mathcal{D}_{\tilde{h}_t, \tilde{a}_t}} R(\tilde{h}_t, \tilde{a}_t)$ , where  $\mathcal{D}_{\tilde{h}_t, \tilde{a}_t}$  denotes all trajectories with  $(\tilde{h}_t, \tilde{a}_t)$  as prefix in the intention sequences. Finally, we assign  $\tilde{R}(\tilde{h}_t, \tilde{a}_t)$  to  $(h_t, a_t)$  and use it as advantage  $\tilde{A}(h_t, a_t)$  for optimization.

### 3.3 Reward-Oriented Granularity Selection For Clustering

Semantic clustering helps compress the dense, unstructured space of natural language actions and observations in dialogue-based RL. However, selecting the appropriate granularity  $k$  remains challenging. For example, in the context of negotiation, we compute standard clustering metrics—Silhouette Score [36], Calinski–Harabasz Index [37], and Davies–Bouldin Index [38]—across different configurations (Figure 2). Despite their usefulness, these metrics tend to favor overly coarse groupings due to the high similarity among actions, overlooking fine-grained distinctions that are critical for our task<sup>2</sup>.

To address this, we propose a reward-oriented granularity selection mechanism that assesses whether further splitting clusters yields meaningful reward change. Unlike traditional metrics based on geometric structure (i.e., distance in embedding space), our method aligns with the RL objective by directly evaluating the impact on reward aggregation.

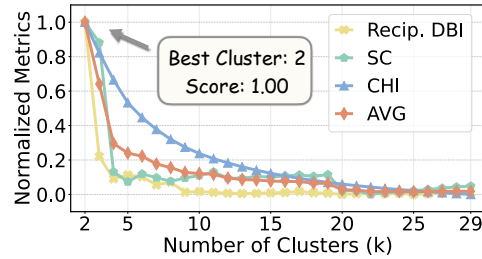

Figure 2: Clustering quality measured by SC, CHI, the reciprocal DBI and the average of three metrics. After normalization and averaging,  $k = 2$  achieves the highest overall score.

**SplitScore** Let  $k \in [2, K]$  denote all possible granularity levels. We use *SplitScore* to select the optimal granularity  $k^*$ , defined as  $\text{SplitScore}(k) = \frac{\delta_k}{|\mathcal{D}|}$ , where  $\delta_k = \left| \tilde{R}^{(k+1)}(h_t, a_t) - \tilde{R}^{(k)}(h_t, a_t) \right|$  represents the reward change for all  $(h_t, a_t)$  pairs when the number of clusters changes from  $k$  to  $k + 1$ , and  $\mathcal{D}$  is the collection of all  $(h_t, a_t)$  pairs.

**Automatic Stopping Criterion** To select the optimal granularity  $k^*$ , we define an early stopping mechanism based on *SplitScore*. Given a threshold  $\epsilon > 0$  and a window size  $\tau$ <sup>3</sup>, we stop splitting when  $\text{SplitScore}(j) < \epsilon$  for all  $j \in [k, k + \tau]$  as  $k$  increases. The selected  $k$  is then taken as  $k^*$ . We prove in Appendix C that *SplitScore* is bounded above a monotonically decreasing function. When *SplitScore* remains below the threshold, further splitting has minimal impact on  $\delta_k$ , indicating that the rewards  $\tilde{R}^{(k)}(h_t, a_t)$  are nearly unchanged and do not significantly affect the training process. Thus, we select the smallest  $k$  that meets the stopping condition, optimizing space compression.

### 3.4 Offline REINFORCE with Aggregated Reward

We use the offline REINFORCE algorithm [23] to optimize the policy. Formally, let  $\pi_\theta(a | s)$  denote the policy parameterized by  $\theta$  and assign the aggregated reward  $\tilde{R}^{(k)}(h_t, a_t)$  to  $\tilde{A}(h_t, a_t)$ . ARIA

<sup>1</sup>Further details on hierarchical agglomerative clustering are provided in Appendix E.

<sup>2</sup>Details of metric calculations are provided in Appendix F.

<sup>3</sup>In this paper, we set  $\epsilon = 0.01$  and  $\tau = 10$ .

169 optimizes the model by maximizing the following objective:

$$J(\theta) = \mathbb{E}_{\tau \sim \pi_\theta} \left[ \sum_{t=0}^T \log \pi_\theta(a_t | h_t) \cdot \tilde{A}(h_t, a_t) \right].$$

## 170 4 Theoretical Analysis

171 In this section, we theoretically show that intention clustering-based aggregation of the rewards in  
172 ARIA can reduce the variance of the gradient descent while maintaining a small bound of bias, thus  
173 improving training stability and efficiency.

### 174 4.1 Background

175 Let  $A(h_t, a_t)$  be the original advantage of  $(h_t, a_t)$  and  $c_k(x)$  be the cluster label as-  
176 signed to instance  $x \in \mathcal{A} \cup \mathcal{O}$  under the granularity  $k$ , we define  $(\tilde{h}_t, \tilde{a}_t) =$   
177  $((c_k(a_1), c_k(o_1), \dots, c_k(a_{t-1}), c_k(o_{t-1})), c_k(a_t))$  and calculate the cluster-averaged reward for  
178  $(\tilde{h}_t, \tilde{a}_t)$  as  $\tilde{R}(\tilde{h}_t, \tilde{a}_t) = \frac{1}{|\mathcal{D}|} \sum_{(\tilde{h}_t, \tilde{a}_t) \in \mathcal{D}} R(\tilde{h}_t, \tilde{a}_t)$ , where  $R(\tilde{h}_t, \tilde{a}_t)$  is the original reward of  $(\tilde{h}_t, \tilde{a}_t)$ .  
179 Then we assign  $\tilde{R}(\tilde{h}_t, \tilde{a}_t)$  to the advantage of  $(h_t, a_t)$  as  $\tilde{A}(h_t, a_t)$ .

### 180 4.2 Main Theorem

181 We first establish that cluster-based aggregation reduces both the total variance of the policy gradient  
182 algorithm and the variance of the policy gradient. We give the following two lemmas.

183 **Lemma 4.1.** *Let  $\tilde{A}$  denote the aggregated advantage, then  $\text{Var}(\tilde{A}) \leq \text{Var}(A)$ .*

184 **Lemma 4.2.** *Given the single-sample policy gradient estimator  $\nabla_\theta \log \pi_\theta(a | s) A(s, a)$ , the vari-  
185 ance is reduced when using the aggregated advantage  $\tilde{A}$ . Specifically,  $\text{Var}(\nabla_\theta \log \pi_\theta \cdot \tilde{A}) \leq$   
186  $\text{Var}(\nabla_\theta \log \pi_\theta \cdot A)$ .*

187 We leave the proof in Appendix D. Building on Lemma 4.2, we show that the variance reduction by  
188 aggregation improves the convergence properties of offline REINFORCE.

189 **Theorem 4.1** (Variance-Improved Convergence). *Given  $N$  i.i.d. trajectories in train set, let*  
190  $\hat{g} = \frac{1}{N} \sum_{i=1}^N \sum_t \nabla_\theta \log \pi_\theta(a_t^i | h_t^i) \tilde{A}_t^i$  *be an estimator of the true gradient  $g$ . Define  $\sigma^2 =$*   
191  $\text{Var}(\nabla_\theta \log \pi_\theta \cdot \tilde{A})$ . *Then, we have  $\|\hat{g} - g\|_2 = O\left(\frac{\sigma}{\sqrt{N}}\right)$ .*

192 *Proof.* Let  $g = \mathbb{E}[g_i]$  be the expected gradient for the  $i$ -th trajectory, where  $g_i = \sum_t \nabla_\theta \log \pi_\theta(a_t^i |$   
193  $h_t^i) \tilde{A}_t^i$  is the gradient estimator. The empirical gradient is  $\hat{g} = \frac{1}{N} \sum_{i=1}^N g_i$ . Let  $\sigma^2 =$   
194  $\text{Var}\left(\sum_t \nabla_\theta \log \pi_\theta(a_t | h_t) \cdot \tilde{A}_t\right)$ . By expectation linearity and trajectory independence, the vari-  
195 ance of the empirical gradient is  $\mathbb{E}[\|\hat{g} - g\|_2^2] = \frac{\sigma^2}{N}$ . By Jensen's inequality [39], we get  $\mathbb{E}[\|\hat{g} - g\|_2] \leq$   
196  $\frac{\sigma}{\sqrt{N}}$ .  $\square$

197 Intuitively, because clustering reduces  $\sigma$ , supposing we want  $|\hat{g} - g| < \epsilon$ , convergence to within  
198  $\epsilon$  requires fewer samples, or equivalently, enables the use of larger step sizes for the same error  
199 tolerance. We then analyze the bias introduced by reward aggregation. To formalize this, we first  
200 give the notion of  $\epsilon$ -bisimulation.

201 **Definition 1** ( $\epsilon$ -Bisimulation). *Actions  $a, a'$  are said to be  $\epsilon$ -bisimilar if, for all states  $s$ ,  $|r(h, a) -$*   
202  $r(h, a')| \leq \epsilon$ ,  $D_{\text{TV}}(P(\cdot | h, a), P(\cdot | h, a')) \leq \epsilon$ , *where the total variation divergence  $D_{\text{TV}}(P(\cdot |$*   
203  $h, a), P(\cdot | h, a'))$  measures how different the two distributions are over next states when different  
204 actions  $a$  and  $a'$  are taken at the same history  $h$ .

205 **Theorem 4.2** (Bounded Bias via  $\epsilon$ -Bisimulation). *Suppose the actions in each cluster are  $\epsilon$ -bisimilar.*  
206 *Then,  $\left| \mathbb{E} \left[ \nabla_\theta \log \pi_\theta(a | h) (A(h, a) - \tilde{A}(h, a)) \right] \right| \leq O(\epsilon)$ .*

207 *Proof.*  $\epsilon$ -bisimulation ensures that value differences within a cluster satisfy  $|Q^\pi(h, a) - Q^\pi(h, a')| \leq$   
208  $\frac{2\epsilon}{1-\gamma}$ , implying that cluster means differ by at most  $O(\epsilon)$ . Since  $\nabla \log \pi$  is bounded, the inner product  
209 bias is  $O(\epsilon)$ .  $\square$



In summary, by using conditional expectations and variance decomposition, we prove that replacing original advantages  $A$  with cluster-averaged advantages  $\bar{A}$  removes the intra-cluster variance  $\mathbb{E}[\text{Var}(A | C)]$ , lowering the total variance of the policy gradient estimate. Provided that the expectation remains approximately unchanged, this variance reduction leads to more stable training and faster convergence. It allows larger optimization steps without divergence and increases the utility of each sample, explaining why cluster-smoothed advantages yield smoother learning curves.

## 5 Experiments

### 5.1 Experimental Setup

**Baselines** We select both **online** and **offline** methods as baselines. For **offline methods**, we include: 1) Behavior Cloning (BC) that trains the policy using successful trajectories. 2) Trajectory-wise DPO [12], which trains language models using successful and failed trajectories. 3) Step-wise DPO [13], which employs success/failure labels at the action level based on simulation outcomes. 4) SPAG [28], which designs a discounted reward and uses offline PPO [22] for optimization of policy gradients. For **online methods**, we select: 1) Archer [20], which utilizes a hierarchical reinforcement learning framework. 2) RAGEN [40], which applies GRPO [34] for policy optimization. Implementation details of baselines are in Appendix K.1.

**Tasks** We evaluate ARIA in both single-agent and adversarial environments (see Appendix H for details). For the **single-agent** setting, we consider two tasks: 1) **Twenty Questions** [8], a dialogue task where the agent plays the role of a guesser, aiming to identify a hidden word selected from a list of 157 candidates by asking up to twenty yes-no questions. The Oracle responds with “Yes” “No” or “Invalid Question”. The agent receives a final reward  $\mathcal{R} = 1$  upon correctly guessing the target word, ending the episode; otherwise, the reward remains 0. 2) **Guess My City** [8], a similar multi-turn task where the agent tries to identify a hidden city from a list of 100 candidates within twenty questions. The agent can ask any type of question and receives free-form responses, not limited to yes/no answers. For the **adversarial** setting, we consider two competitive tasks: 1) **Bargaining** [41], a two-player game where Alice and Bob take turns proposing how to divide a fixed amount of money over a finite time horizon. As the game progresses, each player’s payoff is discounted by a player-specific discount factor. If the game ends without an agreement, both players receive zero payoff. Otherwise, the discounted payoffs for Alice and Bob are given by  $p_A$  and  $p_B$ . 2) **Negotiation** [41], a two-player task where a seller (Alice) and a buyer (Bob) negotiate the price of a product with a true value. Alice and Bob each have subjective valuations. Over a fixed time horizon, the players alternate offers: at odd stages, Alice proposes a price and Bob decides whether to accept; at even stages, Bob proposes and Alice decides. If a price is accepted, the utilities for Alice and Bob are given by  $u_A, u_B$ . If no agreement is reached, both receive zero utility.

**Evaluation** For the **single-agent** environments, following ArCher [20], we evaluate ARIA on a subset of  $N$  tasks from Twenty Questions and Guess My City. We report the **average final reward**, defined as  $\frac{1}{N} \sum_{i=1}^N \mathbb{I}[R_i = 1]$ , where  $R_i$  denotes the final reward for the  $i$ -th trajectory. We set  $N = 200$  for each environment. For the **adversarial** environments, following GLEE [41], we evaluate ARIA across 48 game configurations. In each configuration, the agent plays as either Alice or Bob against fixed opponents, with each setting repeated  $N = 25$  times. In Bargaining, the goal is to achieve a higher payoff than the opponent. In Negotiation, the objective is to sell at a higher price (as the seller) or buy at a lower price (as the buyer). We let ARIA play both roles (Alice and Bob) against various opponents and compute the average win rate for each role, counting each successful completion of the task objective as a win. Specifically, the **average win rate** for Alice in Bargaining is defined as  $W_A = \frac{1}{N} \sum_{i=1}^N \mathbb{I}[p_{i,A} > p_{i,B}]$ , where  $p_A$  and  $p_B$  denote the discounted payoffs for Alice and Bob, respectively (same for Bob). For Negotiation, the average win rate for Alice is defined as  $W_A = \frac{1}{N} \sum_{i=1}^N \mathbb{I}[u_{i,A} > u_{i,B}]$ , where  $u_A$  and  $u_B$  represent the utilities of Alice and Bob (same for Bob).

**Models** We use Llama-3-8B-Instruct [42] as the policy model. For each language action, we obtain its semantic embedding using text-embedding-3-small [43]. In single-agent environments, Oracle is simulated with GPT-4. In adversarial settings, we employ opponent models from different families, including GPT-4o (gpt-4o-2024-08-06) [44], Claude 3 (claude-3-5-sonnet-20240620) [45], and DeepSeek-Chat (DeepSeek-V3) [46].

**Implementation Details** For each scenario, we gather 1,000 games and update the policy using the trajectories. Specifically, in single-agent scenarios, the actor interacts directly with the Oracle (*i.e.*,

Table 1: Main results on multi-agent games. The best results are **bolded**, and the second best ones are underlined. The metric is the average win rate.

| Methods                  | Bargaining   |              |              |              | Negotiation  |              |              |              |
|--------------------------|--------------|--------------|--------------|--------------|--------------|--------------|--------------|--------------|
|                          | GPT-4o       | Deepseek-V3  | Claude-3.5   | AVG.         | GPT-4o       | Deepseek-V3  | Claude-3.5   | AVG.         |
| Vanilla Model            | 30.14        | 24.05        | 33.72        | 29.30        | 37.92        | 36.94        | 40.08        | 38.31        |
| <i>Offline Baselines</i> |              |              |              |              |              |              |              |              |
| BC                       | 46.92        | 40.64        | 55.64        | 47.73        | 31.92        | 40.06        | 32.34        | 34.77        |
| Traj-wise DPO            | 46.77        | 45.58        | 47.57        | 46.64        | 35.57        | 35.68        | 35.38        | 35.54        |
| Step-wise DPO            | 48.91        | 55.48        | 46.00        | 50.13        | 36.33        | 41.56        | 49.17        | 42.35        |
| SPAG                     | 30.68        | 37.26        | 22.43        | 30.12        | 25.83        | 33.86        | 33.65        | 31.11        |
| <i>Online Baselines</i>  |              |              |              |              |              |              |              |              |
| ArCHer                   | 43.78        | 47.35        | 53.94        | 48.36        | 35.00        | 37.84        | 34.64        | 35.83        |
| RAGEN                    | 33.24        | 28.77        | 42.63        | 34.88        | 38.55        | 36.00        | 43.87        | 39.47        |
| <i>Ours</i>              |              |              |              |              |              |              |              |              |
| ARIA (Iter 1)            | 51.54        | 55.26        | 52.66        | 53.15        | 45.65        | 42.69        | 49.02        | 45.79        |
| ARIA (Iter 2)            | <u>53.60</u> | <b>67.33</b> | <u>55.62</u> | <b>58.85</b> | <b>47.46</b> | <u>45.08</u> | 48.93        | <u>47.16</u> |
| ARIA (Iter 3)            | <b>58.66</b> | <u>55.83</u> | <b>59.55</b> | <u>58.01</u> | <u>46.48</u> | <b>50.50</b> | <b>49.42</b> | <b>48.80</b> |

the environment). For adversarial scenarios, we employ self-play to collect competitive interaction data from both players. To evaluate whether ARIA can consistently improve the policy, we perform three iterations. In each iteration, we collect another 1,000 games using the updated policy and conduct a new round of training. Additional implementation details are provided in Appendix K.

## 5.2 Results

**ARIA significantly improves policy performance.** As shown in Table 1, in the adversarial tasks, ARIA achieves the highest average win rate in both *Bargaining* and *Negotiation*, surpassing offline and online baselines by 9.67% and 9.83%, respectively. Similarly, in the single-agent tasks (Table 2), ARIA outperforms all baselines by an average of 9.82%. Existing offline and online RL methods both rely on action sampling and reward assignment, where agents interact with the environment, collect action samples, and assign rewards to those actions. This approach works reasonably well in small action spaces, where repeated sampling provides stable and accurate reward estimates. However, in open-ended language action tasks, where agents act through natural language, the action space grows exponentially to  $\mathcal{V}^{\mathcal{L}}$ , given a vocabulary of size  $\mathcal{V}$  and an average sequence length  $\mathcal{L}$ .

In such vast spaces, each sample typically receives only a binary reward signal, and the sample size  $\mathcal{N}$  is far smaller than the action space, leading to highly sparse and noisy reward signals and making accurate credit assignment challenging. ARIA addresses this by introducing reward aggregation in the intention space, which reduces reward variance and significantly improves learning performance.

Table 2: Main results on single-agent games. The best results are **bolded**, and the second-best ones are underlined. The metric is the average reward.

| Methods                  | Twenty.      | Guess.       | AVG.         |
|--------------------------|--------------|--------------|--------------|
| Vanilla Model            | 27.50        | 13.50        | 20.50        |
| <i>Offline Baselines</i> |              |              |              |
| BC                       | 27.50        | 5.50         | 16.50        |
| Traj-wise DPO            | 27.00        | 17.50        | 22.25        |
| Step-wise DPO            | 27.50        | 11.50        | 19.50        |
| SPAG                     | 26.50        | 13.00        | 19.75        |
| <i>Online Baselines</i>  |              |              |              |
| ArCHer                   | 26.00        | 10.00        | 16.25        |
| RAGEN                    | 27.50        | 10.50        | 16.00        |
| <i>Ours</i>              |              |              |              |
| ARIA (Iter 1)            | 28.00        | 29.00        | 28.50        |
| ARIA (Iter 2)            | <u>29.50</u> | <u>32.00</u> | <u>30.75</u> |
| ARIA (Iter 3)            | <b>34.50</b> | <b>36.00</b> | <b>35.25</b> |

**ARIA can continuously improve policy through iteration.** After confirming that ARIA significantly outperforms the baselines, we further investigate its performance under iterative updates. As shown in Table 1 and Table 2, ARIA achieves additional gains of 3.27% and 1.85% after two and three iterations, respectively. This suggests that reward aggregation effectively reduces variance while preserving essential discriminative signals for policy learning, reflecting a favorable bias-variance trade-off. It further enhances sample efficiency and mitigates the risk of premature convergence caused by excessive smoothing, demonstrating that reward aggregation can deliver stable and cumulative performance improvements.

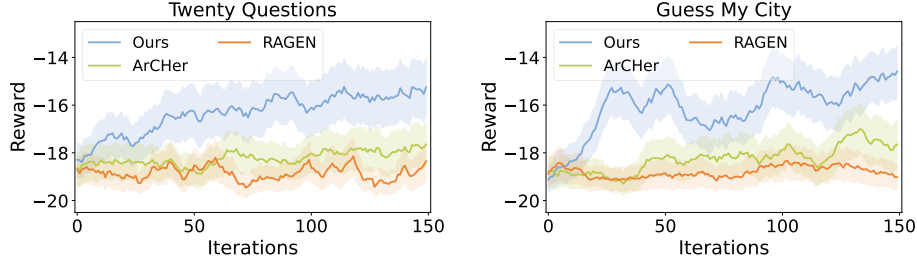

(a) Reward over Iterations on *Twenty Questions* (b) Reward over Iterations on *Guess My City*

Figure 3: (a) and (b) show the reward curves of ARIA and other online methods over iterations on the *Twenty Questions* and *Guess My City* respectively.

### 5.3 Extending to Online ARIA

**Settings** We first perform reward aggregation using pre-collected trajectories. The aggregated rewards are then used to initialize a point-wise reward model (RM), implemented as Llama-3.1-8B-Instruct [42], consistent with the policy model. Subsequently, the policy interacts with the environment to dynamically generate new samples, which are scored by the RM to update the policy. Additionally, the RM is periodically updated with the latest collected data, allowing it to evolve alongside the policy. We conduct the online ARIA on two single-agent games to conveniently observe reward at each iteration. Detailed parameter settings are provided in Appendix K.2.

**Results** As shown in Figure 3, ARIA achieves faster reward improvement and consistently higher returns across iterations compared to existing online methods (ArCher and RAGEN). This improvement stems from two key advantages: 1) Reward aggregation provides an initial dense and low-variance reward signal, accelerating early-stage policy learning. 2) The dynamic RM update ensures alignment between the reward function and the evolving policy, preventing drift and reward misalignment common in static settings. Together, these factors enhance both sample efficiency and reward shaping accuracy, leading to faster and more stable policy improvement.

## 6 Analysis

### 6.1 Significant Reduction in Reward Variance Through Aggregation

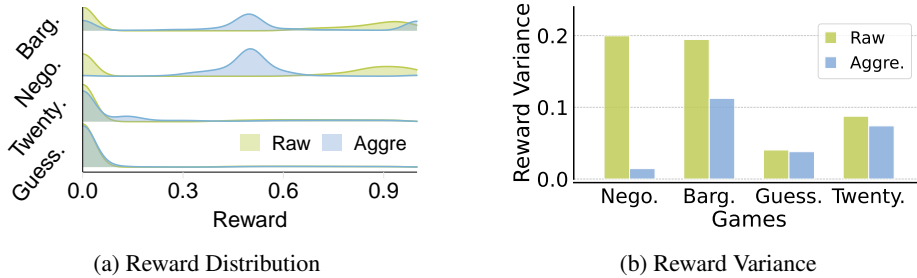

Figure 4: (a) illustrates the distribution of rewards. (b) presents the change in reward variance.

We show variance change before and after reward aggregation in Figure 4. As shown in Figure 4a, reward aggregation markedly reduces the fluctuation range of action rewards. The original binary reward distributions are highly polarized, with values mostly concentrated near 0 or 1. In a large action space, most actions are sampled only once, and the corresponding binary reward is directly assigned to each action, resulting in high reward variance. By contrast, after reward aggregation, actions within the same cluster share a common reward, which significantly smooths the distribution and reduces variance. Figure 4b further demonstrates that reward variance decreases across all four tasks, highlighting the effectiveness and necessity of reward aggregation in stabilizing policy learning.

### 6.2 Reward Aggregation Reduces Variance and Improves Optimization

To evaluate whether reward aggregation improves training efficiency, we first compare the policy loss curves under different reward shaping strategies in Figure 5b. The results show that ARIA,



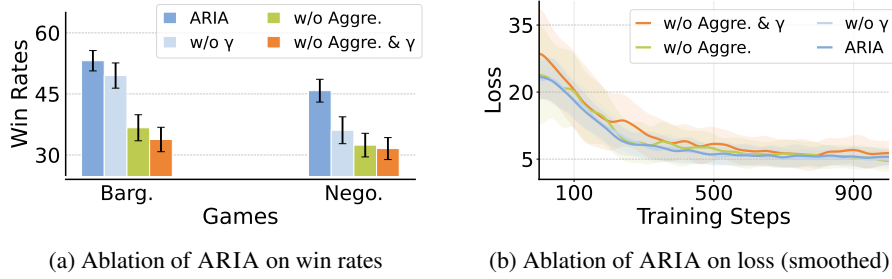

Figure 5: Ablation of ARIA. (a) shows win rates on adversarial games and (b) shows training loss curves under different ablation settings in adversarial games.

which applies semantic-level reward aggregation, accelerates loss reduction compared to the vanilla REINFORCE baseline. This indicates that shaping the reward through aggregation provides a stronger learning signal, enabling faster policy updates and improved sample efficiency in offline training. We further observe that, despite converging to similar loss levels, the methods exhibit substantial differences in downstream performance. As shown in Figure 5a, ARIA outperforms other variants by 17.91% and 13.80% on the bargaining and negotiation tasks, respectively. We attribute these gains to the complementary effects of reward decay and reward aggregation: Reward decay introduces temporal structure that helps assign credit to early-stage actions, but plays a limited role in reducing signal noise. In contrast, reward aggregation substantially lowers reward variance by assigning shared signals to semantically similar actions, thereby improving the quality of gradient estimation. This variance reduction enables more stable and efficient optimization and plays a central role in enhancing policy performance in open-ended language action settings.

### 6.3 Generalization of ARIA to Other Models

Table 3: ARIA on Qwen2.5-7B-Instruct and Qwen2.5-1.5B-Instruct.

| Methods                      | Bargaining | Negotiation | AVG.                      |
|------------------------------|------------|-------------|---------------------------|
| <i>Qwen2.5-7B-Instruct</i>   |            |             |                           |
| Vanilla                      | 37.92      | 35.50       | 36.71                     |
| ARIA                         | 65.96      | 47.06       | 56.51 (+19.8 $\uparrow$ ) |
| <i>Qwen2.5-1.5B-Instruct</i> |            |             |                           |
| Vanilla                      | 0.02       | 18.22       | 9.12                      |
| ARIA                         | 0.01       | 20.47       | 10.24 (+1.12 $\uparrow$ ) |

In Section 5.2, we show that ARIA achieves significant improvements on Llama3-8B-Instruct. To further assess the transferability of ARIA, we apply it to the Qwen models (Qwen2.5-7B-Instruct [47] and Qwen2.5-1.5B-Instruct [47]) and conduct comparative experiments on two adversarial games<sup>4</sup>. As shown in Table 3, we observe that altering the base model consistently yields improvements. This suggests that our reward aggregation approach is model-agnostic and independent of specific architectural features or pretraining data of the underlying language models. We attribute this generalizability to the shared structural properties in the semantic spaces learned by large-scale language models. By performing aggregation in the intention space, ARIA leverages these commonalities to reduce reward variance while preserving task-specific discriminative signals.

## 7 Conclusion

In this paper, we address the core challenges of reinforcement learning in open-ended language action tasks, where agents must operate in **exponentially large action spaces and learn from sparse, delayed rewards**. To tackle the resulting high variance in policy optimization, we introduce **semantic projection**, a novel intention-aware framework that maps natural language actions from the high-dimensional token space into a low-dimensional intention space. This projection enables reward aggregation across semantically similar actions, effectively densifying sparse rewards and reducing gradient variance. Built on this idea, we propose ARIA, which automatically discovers task-specific intention structures via hierarchical clustering and integrates the aggregated rewards into REINFORCE for efficient policy learning. We further provide a theoretical analysis showing

<sup>4</sup>All the settings are the same as those in Section 5.

that replacing original advantages with cluster-averaged advantages reduces intra-cluster variance, thereby lowering the overall variance of the policy gradient and improving learning stability. Extensive experiments across four diverse tasks—including both single-agent and adversarial two-agent games—demonstrate that ARIA improves training stability, accelerates convergence, and consistently outperforms strong offline and online RL baselines. Our findings highlight the importance of structure-aware reward shaping in scaling reinforcement learning for language agents in open-ended environments.

## References

- [1] Lei Wang, Chen Ma, Xueyang Feng, Zeyu Zhang, Hao Yang, Jingsen Zhang, Zhiyuan Chen, Jiakai Tang, Xu Chen, Yankai Lin, et al. A survey on large language model based autonomous agents. *Frontiers of Computer Science*, 18(6):186345, 2024.
- [2] Junyu Luo, Weizhi Zhang, Ye Yuan, Yusheng Zhao, Junwei Yang, Yiyang Gu, Bohan Wu, Binqi Chen, Ziyue Qiao, Qingqing Long, et al. Large language model agent: A survey on methodology, applications and challenges. *arXiv preprint arXiv:2503.21460*, 2025.
- [3] Theodore Sumers, Shunyu Yao, Karthik Narasimhan, and Thomas Griffiths. Cognitive architectures for language agents. *Transactions on Machine Learning Research*, 2023.
- [4] Izzeddin Gur, Hiroki Furuta, Austin Huang, Mustafa Safdari, Yutaka Matsuo, Douglas Eck, and Aleksandra Faust. A real-world webagent with planning, long context understanding, and program synthesis. *arXiv preprint arXiv:2307.12856*, 2023.
- [5] Shuyan Zhou, Frank F Xu, Hao Zhu, Xuhui Zhou, Robert Lo, Abishek Sridhar, Xianyi Cheng, Tianyue Ou, Yonatan Bisk, Daniel Fried, et al. Webarena: A realistic web environment for building autonomous agents. *arXiv preprint arXiv:2307.13854*, 2023.
- [6] Ruoyao Wang, Peter Jansen, Marc-Alexandre Côté, and Prithviraj Ammanabrolu. Scienceworld: Is your agent smarter than a 5th grader? *arXiv preprint arXiv:2203.07540*, 2022.
- [7] Yikai Zhang, Siyu Yuan, Caiyu Hu, Kyle Richardson, Yanghua Xiao, and Jiangjie Chen. Timearena: Shaping efficient multitasking language agents in a time-aware simulation. *arXiv preprint arXiv:2402.05733*, 2024.
- [8] Marwa Abdulhai, Isadora White, Charlie Snell, Charles Sun, Joey Hong, Yuexiang Zhai, Kelvin Xu, and Sergey Levine. Lmrl gym: Benchmarks for multi-turn reinforcement learning with language models. *arXiv preprint arXiv:2311.18232*, 2023.
- [9] Tim R Davidson, Veniamin Veselovsky, Martin Josifoski, Maxime Peyrard, Antoine Bosselut, Michal Kosinski, and Robert West. Evaluating language model agency through negotiations. *arXiv preprint arXiv:2401.04536*, 2024.
- [10] Federico Bianchi, Patrick John Chia, Mert Yuksekgonul, Jacopo Tagliabue, Dan Jurafsky, and James Zou. How well can llms negotiate? negotiationarena platform and analysis. *arXiv preprint arXiv:2402.05863*, 2024.
- [11] Bodhisattwa Prasad Majumder, Bhavana Dalvi Mishra, Peter Jansen, Oyvind Tafjord, Niket Tandon, Li Zhang, Chris Callison-Burch, and Peter Clark. Clin: A continually learning language agent for rapid task adaptation and generalization. *arXiv preprint arXiv:2310.10134*, 2023.
- [12] Yifan Song, Da Yin, Xiang Yue, Jie Huang, Sujian Li, and Bill Yuchen Lin. Trial and error: Exploration-based trajectory optimization for llm agents. *arXiv preprint arXiv:2403.02502*, 2024.
- [13] Weimin Xiong, Yifan Song, Xiutian Zhao, Wenhao Wu, Xun Wang, Ke Wang, Cheng Li, Wei Peng, and Sujian Li. Watch every step! llm agent learning via iterative step-level process refinement. *arXiv preprint arXiv:2406.11176*, 2024.
- [14] Pranav Putta, Edmund Mills, Naman Garg, Sumeet Motwani, Chelsea Finn, Divyansh Garg, and Rafael Rafailov. Agent q: Advanced reasoning and learning for autonomous ai agents. *arXiv preprint arXiv:2408.07199*, 2024.
- [15] Ruihan Yang, Jiangjie Chen, Yikai Zhang, Siyu Yuan, Aili Chen, Kyle Richardson, Yanghua Xiao, and Deqing Yang. Selfgoal: Your language agents already know how to achieve high-level goals. In *Proceedings of the 2025 Conference of the Nations of the Americas Chapter of the Association for Computational Linguistics: Human Language Technologies (Volume 1: Long Papers)*, pages 799–819, 2025.

- [16] Mohit Shridhar, Xingdi Yuan, Marc-Alexandre Côté, Yonatan Bisk, Adam Trischler, and Matthew Hausknecht. Alfworld: Aligning text and embodied environments for interactive learning. *arXiv preprint arXiv:2010.03768*, 2020.
- [17] Shunyu Yao, Howard Chen, John Yang, and Karthik Narasimhan. Webshop: Towards scalable real-world web interaction with grounded language agents, 2023.
- [18] Mike Lewis, Denis Yarats, Yann N Dauphin, Devi Parikh, and Dhruv Batra. Deal or no deal? end-to-end learning for negotiation dialogues. *arXiv preprint arXiv:1706.05125*, 2017.
- [19] Eilam Shapira, Omer Madmon, Itamar Reinman, Samuel Joseph Amouyal, Roi Reichart, and Moshe Tennenholtz. Glee: A unified framework and benchmark for language-based economic environments. *arXiv preprint arXiv:2410.05254*, 2024.
- [20] Yifei Zhou, Andrea Zanette, Jiayi Pan, Sergey Levine, and Aviral Kumar. Archer: Training language model agents via hierarchical multi-turn rl. *arXiv preprint arXiv:2402.19446*, 2024.
- [21] Yifei Zhou, Song Jiang, Yuandong Tian, Jason Weston, Sergey Levine, Sainbayar Sukhbaatar, and Xian Li. Sweet-rl: Training multi-turn llm agents on collaborative reasoning tasks. *arXiv preprint arXiv:2503.15478*, 2025.
- [22] John Schulman, Filip Wolski, Prafulla Dhariwal, Alec Radford, and Oleg Klimov. Proximal policy optimization algorithms. *arXiv preprint arXiv:1707.06347*, 2017.
- [23] Ronald J. Williams. Simple statistical gradient-following algorithms for connectionist reinforcement learning. *Machine Learning*, 8:229–256, 1992.
- [24] Joe H Ward Jr. Hierarchical grouping to optimize an objective function. *Journal of the American statistical association*, 58(301):236–244, 1963.
- [25] Xuhui Zhou, Hao Zhu, Leena Mathur, Ruohong Zhang, Haofei Yu, Zhengyang Qi, Louis-Philippe Morency, Yonatan Bisk, Daniel Fried, Graham Neubig, et al. Sotopia: Interactive evaluation for social intelligence in language agents. *arXiv preprint arXiv:2310.11667*, 2023.
- [26] Rong Ye, Yongxin Zhang, Yikai Zhang, Haoyu Kuang, Zhongyu Wei, and Peng Sun. Multi-agent kto: Reinforcing strategic interactions of large language model in language game. *arXiv preprint arXiv:2501.14225*, 2025.
- [27] Jonathan Light, Min Cai, Sheng Shen, and Ziniu Hu. Avalonbench: Evaluating llms playing the game of avalon. *arXiv preprint arXiv:2310.05036*, 2023.
- [28] Pengyu Cheng, Tianhao Hu, Han Xu, Zhisong Zhang, Yong Dai, Lei Han, Xiaolong Li, et al. Self-playing adversarial language game enhances llm reasoning. *Advances in Neural Information Processing Systems*, 37:126515–126543, 2024.
- [29] Dan Qiao, Chenfei Wu, Yaobo Liang, Juntao Li, and Nan Duan. Gameeval: Evaluating llms on conversational games. *arXiv preprint arXiv:2308.10032*, 2023.
- [30] Stuart Lloyd. Least squares quantization in pcm. *IEEE transactions on information theory*, 28(2):129–137, 1982.
- [31] Martin Ester, Hans-Peter Kriegel, Jörg Sander, Xiaowei Xu, et al. A density-based algorithm for discovering clusters in large spatial databases with noise. In *kdd*, volume 96, pages 226–231, 1996.
- [32] Rafael Rafailov, Archit Sharma, Eric Mitchell, Christopher D Manning, Stefano Ermon, and Chelsea Finn. Direct preference optimization: Your language model is secretly a reward model. *Advances in Neural Information Processing Systems*, 36:53728–53741, 2023.
- [33] Kawin Ethayarajh, Winnie Xu, Niklas Muennighoff, Dan Jurafsky, and Douwe Kiela. Kto: Model alignment as prospect theoretic optimization. *arXiv preprint arXiv:2402.01306*, 2024.
- [34] Zhihong Shao, Peiyi Wang, Qihao Zhu, Runxin Xu, Junxiao Song, Xiao Bi, Haowei Zhang, Mingchuan Zhang, YK Li, Y Wu, et al. Deepseekmath: Pushing the limits of mathematical reasoning in open language models. *arXiv preprint arXiv:2402.03300*, 2024.
- [35] Fionn Murtagh and Pedro Contreras. Methods of hierarchical clustering. *arXiv preprint arXiv:1105.0121*, 2011.

- [36] Peter J Rousseeuw. Silhouettes: a graphical aid to the interpretation and validation of cluster analysis. *Journal of computational and applied mathematics*, 20:53–65, 1987.
- [37] Tadeusz Caliński and Jerzy Harabasz. A dendrite method for cluster analysis. *Communications in Statistics-theory and Methods*, 3(1):1–27, 1974.
- [38] David L Davies and Donald W Bouldin. A cluster separation measure. *IEEE transactions on pattern analysis and machine intelligence*, (2):224–227, 2009.
- [39] J. L. W. V. Jensen. Sur les fonctions convexes et les inégalités entre les valeurs moyennes. *Acta Mathematica*, 30:175–193, 1906.
- [40] Zihan Wang\*, Kangrui Wang\*, Qineng Wang\*, Pingyue Zhang\*, Linjie Li\*, Zhengyuan Yang, Kefan Yu, Minh Nhat Nguyen, Licheng Liu, Eli Gottlieb, Monica Lam, Yiping Lu, Kyunghyun Cho, Jiajun Wu, Li Fei-Fei, Lijuan Wang, Yejin Choi, and Manling Li. Training agents by reinforcing reasoning, 2025.
- [41] Eilam Shapira, Omer Madmon, Itamar Reinman, Samuel Joseph Amouyal, Roi Reichart, and Moshe Tennenholtz. Glee: A unified framework and benchmark for language-based economic environments, 2024.
- [42] Meta. Llama 3 model card. 2024.
- [43] Arvind Neelakantan, Tao Xu, Raul Puri, Alec Radford, Jesse Michael Han, Jerry Tworek, Qiming Yuan, Nikolas Tezak, Jong Wook Kim, Chris Hallacy, Johannes Heidecke, Pranav Shyam, Boris Power, Tyna Eloundou Nekoul, Girish Sastry, Gretchen Krueger, David Schnurr, Felipe Petroski Such, Kenny Hsu, Madeleine Thompson, Tabarak Khan, Toki Sherbakov, Joanne Jang, Peter Welinder, and Lilian Weng. Text and code embeddings by contrastive pre-training, 2022.
- [44] OpenAI. Gpt-4 technical report, 2023.
- [45] Anthropic. Introducing claude 2.1, Nov 2023. Available from Anthropic: <https://www.anthropic.com/news/claude-2-1>.
- [46] DeepSeek-AI, Aixin Liu, Bei Feng, Bing Xue, Bingxuan Wang, Bochao Wu, Chengda Lu, Chenggang Zhao, Chengqi Deng, Chenyu Zhang, Chong Ruan, Damai Dai, Daya Guo, Dejian Yang, Deli Chen, Dongjie Ji, Erhang Li, Fangyun Lin, Fucong Dai, Fuli Luo, Guangbo Hao, Guanting Chen, Guowei Li, H. Zhang, Han Bao, Hanwei Xu, Haocheng Wang, Haowei Zhang, Honghui Ding, Huajian Xin, Huazuo Gao, Hui Li, Hui Qu, J. L. Cai, Jian Liang, Jianzhong Guo, Jiaqi Ni, Jiashi Li, Jiawei Wang, Jin Chen, Jingchang Chen, Jingyang Yuan, Junjie Qiu, Junlong Li, Junxiao Song, Kai Dong, Kai Hu, Kaige Gao, Kang Guan, Kexin Huang, Kuai Yu, Lean Wang, Lecong Zhang, Lei Xu, Leyi Xia, Liang Zhao, Litong Wang, Liyue Zhang, Meng Li, Miaojuan Wang, Mingchuan Zhang, Minghua Zhang, Minghui Tang, Mingming Li, Ning Tian, Panpan Huang, Peiyi Wang, Peng Zhang, Qiancheng Wang, Qihao Zhu, Qinyu Chen, Qiushi Du, R. J. Chen, R. L. Jin, Ruiqi Ge, Ruisong Zhang, Ruizhe Pan, Runji Wang, Runxin Xu, Ruoyu Zhang, Ruyi Chen, S. S. Li, Shanghao Lu, Shangyan Zhou, Shanhuang Chen, Shaoqing Wu, Shengfeng Ye, Shengfeng Ye, Shirong Ma, Shiyu Wang, Shuang Zhou, Shuiping Yu, Shunfeng Zhou, Shuting Pan, T. Wang, Tao Yun, Tian Pei, Tianyu Sun, W. L. Xiao, Wangding Zeng, Wanbiao Zhao, Wei An, Wen Liu, Wenfeng Liang, Wenjun Gao, Wenqin Yu, Wentao Zhang, X. Q. Li, Xiangyue Jin, Xianzu Wang, Xiao Bi, Xiaodong Liu, Xiaohan Wang, Xiaojin Shen, Xiaokang Chen, Xiaokang Zhang, Xiaosha Chen, Xiaotao Nie, Xiaowen Sun, Xiaoxiang Wang, Xin Cheng, Xin Liu, Xin Xie, Xingchao Liu, Xingkai Yu, Xinnan Song, Xinxia Shan, Xinyi Zhou, Xinyu Yang, Xinyuan Li, Xuecheng Su, Xuheng Lin, Y. K. Li, Y. Q. Wang, Y. X. Wei, Y. X. Zhu, Yang Zhang, Yanhong Xu, Yanhong Xu, Yanping Huang, Yao Li, Yao Zhao, Yaofeng Sun, Yaohui Li, Yaohui Wang, Yi Yu, Yi Zheng, Yichao Zhang, Yifan Shi, Yiliang Xiong, Ying He, Ying Tang, Yishi Piao, Yisong Wang, Yixuan Tan, Yiyang Ma, Yiyuan Liu, Yongqiang Guo, Yu Wu, Yuan Ou, Yuchen Zhu, Yudian Wang, Yue Gong, Yuheng Zou, Yujia He, Yukun Zha, Yunfan Xiong, Yunxian Ma, Yuting Yan, Yuxiang Luo, Yuxiang You, Yuxuan Liu, Yuyang Zhou, Z. F. Wu, Z. Z. Ren, Zehui Ren, Zhangli Sha, Zhe Fu, Zhean Xu, Zhen Huang, Zhen Zhang, Zhenda Xie, Zhengyan Zhang, Zhewen Hao, Zhibin Gou, Zhicheng Ma, Zhigang Yan, Zhihong Shao, Zhipeng Xu, Zhiyu Wu, Zhongyu Zhang, Zhuoshu Li, Zihui Gu, Zijia Zhu, Zijun Liu, Zilin Li, Ziwei Xie, Ziyang Song, Ziyi Gao, and Zizheng Pan. Deepseek-v3 technical report, 2025.
- [47] Qwen Team. Qwen2.5: A party of foundation models, September 2024.

## 519 Appendix

### 520 A Limitations

521 While ARIA shows strong performance across various single-agent and adversarial tasks, it relies on  
 522 clustering in the semantic embedding space to define intention groups, which introduces two limita-  
 523 tions. First, the effectiveness of reward aggregation depends on the quality of sentence embeddings.  
 524 If embeddings fail to capture fine-grained behavioral differences, clustering may become coarse or  
 525 misaligned, impairing learning. Second, the current formulation assumes that intentions are discrete  
 526 and well-separated. This assumption may not hold in tasks with overlapping goals. Extending ARIA  
 527 to support soft or continuous intention representations and incorporating task-specific structures into  
 528 the projection process are promising directions for future work.

### 529 B Ablation on the Threshold $\epsilon$

530 We conduct an ablation study to exam-  
 531 ine the effect of different thresholds  $\epsilon$   
 532 for *SplitScore* on performance. Specif-  
 533 ically, we compare  $\epsilon = 0.1$ , which  
 534 corresponds to bargaining with  $k = 4$   
 535 clusters and negotiation with  $k = 2$ ,  
 536 and  $\epsilon = 0.001$ , which corresponds to  
 537 both bargaining and negotiation with  
 538  $k = 100$ . As shown in Table 4, a larger  $\epsilon$  results in coarser reward aggregation, potentially assigning  
 539 the same reward to actions with different semantics, which degrades performance. Conversely, a  
 540 smaller  $\epsilon$  causes overly fine-grained aggregation, making the reward signal too sparse for effective  
 541 learning, which also harms performance. Therefore, we set  $\epsilon = 0.01$  for all experiments.

Table 4: Ablation of Threshold  $\epsilon$ .

| Methods                  | Bargaining   | Negotiation  | AVG.            |
|--------------------------|--------------|--------------|-----------------|
| ARIA ( $\gamma = 0.01$ ) | <b>53.15</b> | <b>45.79</b> | <b>49.47</b>    |
| w/ $\gamma = 0.1$        | 43.86        | 38.02        | 40.91 (-8.56 ↓) |
| w/ $\gamma = 0.001$      | 46.63        | 35.77        | 41.20 (-8.27 ↓) |

### 542 C Analysis of SplitScore

543 In section 3.3, we claim that *SplitScore* is bounded above a monotonically decreasing function. When  
 544 *SplitScore* consistently falls below a predefined threshold, it indicates that further splits contribute  
 545 little to the total reward change  $\delta_k$ . In this case, the reward values  $\tilde{R}(h_t, a_t)$  remain largely stable,  
 546 and additional splits are unlikely to affect training outcomes significantly. We provide the detailed  
 547 explanation as follows.

548 We begin by recalling the definition:

$$SplitScore(k) = \frac{\delta_k}{|\mathcal{D}|}, \quad (1)$$

549 where  $\delta_k = \sum_{(h_t, a_t) \in \mathcal{D}} |\tilde{R}^{(k+1)}(h_t, a_t) - \tilde{R}^{(k)}(h_t, a_t)|$  represents the total absolute change in  
 550 reward across all  $(h_t, a_t)$  when the clustering granularity increases from  $k$  to  $k + 1$ . Here,  $\mathcal{D}$  denotes  
 551 the set of all action instances.

552 We can reformulate Equation 1 as

$$SplitScore(k) = \frac{n_k \cdot \bar{\delta}_k}{|\mathcal{D}|},$$

553 where  $\mathcal{D}_k \subseteq \mathcal{D}$  is the set of instances affected by the change in clustering,  $n_k = |\mathcal{D}_k|$ , and  
 554  $\bar{\delta}_k = \frac{1}{n_k} \sum_{(h_t, a_t) \in \mathcal{D}_k} |\tilde{R}^{(k+1)}(h_t, a_t) - \tilde{R}^{(k)}(h_t, a_t)|$  is the average reward change over the affected  
 555 instances.

556 **Theoretical Boundaries and Edge Cases.** Given the reward  $\tilde{R}(h_t, a_t) \in [0, 1]$ , it follows that  
 557  $\bar{\delta}_k \in [0, 1]$ . This leads to the following inequality:

$$0 \leq SplitScore(k) = \frac{n_k \cdot \bar{\delta}_k}{|\mathcal{D}|} \leq \frac{n_k}{|\mathcal{D}|} \leq \frac{n_{k, \max}}{|\mathcal{D}|},$$



where  $n_k$  is the number of affected instances with  $k$  clusters, and  $n_{k,\max}$  denotes its maximum possible value. Since hierarchical clustering splits one cluster at a time, the number of affected instances  $n_k$  typically decreases as  $k$  increases. Therefore,  $n_{k,\max}$  is a monotonically decreasing function of  $k$ , which ensures the convergence of *SplitScore*.

We further note two edge cases:

- 1) If  $n_k = 0$  or  $\bar{\delta}_k = 0$ , then  $\text{SplitScore}(k) = 0$ , indicating that the split causes no reward change.
- 2) If  $n_k = n_{k,\max}$  and  $\bar{\delta}_k = 1$ , the split results in the maximum possible total reward change.

Therefore, the decay of *SplitScore* provides a natural criterion for early stopping, as it reflects diminishing changes in the reward signal expressivity with respect to further semantic partitioning.

## D Proof of Lemma

In this section, we give detailed proof of the Lemma in Section 4.

**Lemma D.1.** *Let  $\tilde{A}$  denote the aggregated advantage, then  $\text{Var}(\tilde{A}) \leq \text{Var}(A)$ .*

*Proof.* Let  $C$  denote the chosen cluster under granularity  $k$ . By the law of total variance, we have

$$\text{Var}(A) = \mathbb{E}[\text{Var}(A | C)] + \text{Var}(\mathbb{E}[A | C]).$$

Since  $\mathbb{E}_C[\text{Var}(A | C)] \geq 0$ , it follows that

$$\text{Var}(\tilde{A}) = \text{Var}(\mathbb{E}[A | C]) = \text{Var}(A) - \mathbb{E}[\text{Var}(A | C)] \leq \text{Var}(A).$$

□

Intuitively, replacing each trajectory's advantage with the cluster average filters out intra-cluster noise, leading to a more stable estimate. We then show that replacing the original advantage  $A$  with the aggregated advantage  $\tilde{A}$  reduces the variance of the policy gradient estimator.

**Lemma D.2.** *Given the single-sample policy gradient estimator  $\nabla_\theta \log \pi_\theta(a | s) A(s, a)$ , the variance is reduced when using the aggregated advantage  $\tilde{A}$ . Specifically,  $\text{Var}(\nabla_\theta \log \pi_\theta \cdot \tilde{A}) \leq \text{Var}(\nabla_\theta \log \pi_\theta \cdot A)$ .*

*Proof.* The variance of the single-sample policy gradient estimator can be written as

$$\text{Var}(\nabla_\theta \log \pi_\theta \cdot A) = \mathbb{E}[(\nabla_\theta \log \pi_\theta)^2 A^2] - (\mathbb{E}[\nabla_\theta \log \pi_\theta \cdot A])^2.$$

Replacing  $A$  with a constant  $\tilde{A}$  within each cluster leads to the following decomposition:

$$\mathbb{E}[(\nabla_\theta \log \pi_\theta)^2 A^2] - \mathbb{E}[(\nabla_\theta \log \pi_\theta)^2 \tilde{A}^2] = \mathbb{E}\left[\mathbb{E}[(\nabla_\theta \log \pi_\theta)^2 (A - \tilde{A})^2 | C]\right] \geq 0.$$

Therefore,

$$\text{Var}(\nabla_\theta \log \pi_\theta \cdot \tilde{A}) \leq \text{Var}(\nabla_\theta \log \pi_\theta \cdot A).$$

□

## 580 E Algorithm of Hierarchical Agglomerative Clustering

581 We illustrate the process of the Hierarchical Agglomerative Clustering (HAC) algorithm in Algo-  
582 rithm 1.

---

### Algorithm 1 Hierarchical Agglomerative Clustering (HAC) with Average Linkage

---

**Require:** Dataset  $\mathcal{X} = \{\mathbf{x}_1, \dots, \mathbf{x}_n\}$

**Ensure:** A dendrogram representing the hierarchy of clusters

1: Initialize clusters:  $\mathcal{C} \leftarrow \{\{\mathbf{x}_1\}, \dots, \{\mathbf{x}_n\}\}$

2: **while**  $|\mathcal{C}| > 1$  **do**

3:   Compute pairwise distances using average linkage:

$$(C_p, C_q) = \arg \min_{C_i \neq C_j \in \mathcal{C}} \frac{1}{|C_i||C_j|} \sum_{\mathbf{x} \in C_i} \sum_{\mathbf{y} \in C_j} \|\mathbf{x} - \mathbf{y}\|_2$$

4:   Merge clusters:  $C_{\text{new}} \leftarrow C_p \cup C_q$

5:   Update cluster set:

$$\mathcal{C} \leftarrow (\mathcal{C} \setminus \{C_p, C_q\}) \cup \{C_{\text{new}}\}$$

6: **end while**

7: **return** Dendrogram recording the merge steps

---

## 583 F Clustering Metric Calculation Details

584 We use three standard indicators to evaluate clustering performance: the Silhouette Coefficient [36],  
585 the Calinski-Harabasz Index [37], and the Davies-Bouldin Index [38].

### 586 F.1 Silhouette Coefficient

587 The Silhouette Coefficient is a widely used metric for evaluating clustering quality. It captures two  
588 key aspects: cohesion, which measures how closely related the objects within a cluster are, and  
589 separation, which assesses how distinct a cluster is from others. For each sample  $i$ , the Silhouette  
590 Coefficient  $s(i)$  is defined as

$$s(i) = \frac{b(i) - a(i)}{\max\{a(i), b(i)\}},$$

591 where  $a(i)$  denotes the average distance between  $i$  and all other points in the same cluster (intra-  
592 cluster distance), and  $b(i)$  is the minimum average distance from  $i$  to all points in any other cluster,  
593 of which  $i$  is not a member (nearest-cluster distance).

594 The value of  $s(i)$  ranges from  $-1$  to  $1$ . A value close to  $1$  indicates that the sample is well matched to  
595 its own cluster and poorly matched to neighboring clusters. A value near  $0$  suggests that the sample  
596 lies between two clusters. A negative value implies potential misclassification, where the sample  
597 may have been assigned to the wrong cluster. The overall quality of a clustering configuration can be  
598 quantified by the mean Silhouette Coefficient across all samples.

### 599 F.2 Calinski-Harabasz Index

600 The Calinski-Harabasz Index (CHI) evaluates clustering quality based on the principle that good  
601 clusters should be compact and well separated. Given a clustering result with  $k$  clusters and  $n$  total  
602 samples, CHI is defined as

$$\text{CHI} = \frac{\text{Tr}(B_k)}{\text{Tr}(W_k)} \cdot \frac{n - k}{k - 1},$$

603 where  $\text{Tr}(B_k)$  is the trace of the between-cluster dispersion matrix, which measures the distance of  
604 each cluster center from the overall mean, and  $\text{Tr}(W_k)$  is the trace of the within-cluster dispersion  
605 matrix, indicating the compactness of each cluster.

606 A higher CHI value suggests better-defined clusters, with dense intra-cluster groupings and well-  
607 separated inter-cluster distances. This metric is particularly effective when the number of clusters  $k$   
608 is known or fixed.

Table 5: The results of significant tests.

| Methods                  | Bargaining |         |         | Negotiation |         |         |
|--------------------------|------------|---------|---------|-------------|---------|---------|
|                          | Win Rate   | t-value | p-value | Win Rate    | t-value | p-value |
| Vanilla Model            | 29.30      | 15.53   | <0.001  | 38.31       | 5.92    | <0.001  |
| <i>Offline Baselines</i> |            |         |         |             |         |         |
| BC                       | 47.73      | 1.6711  | 0.0475  | 34.77       | 9.91    | <0.001  |
| Traj-wise DPO            | 46.64      | 2.99    | 0.0013  | 35.54       | 9.60    | <0.001  |
| Step-wise DPO            | 50.13      | 2.60    | 0.0047  | 42.35       | 3.00    | 0.0014  |
| SPAG                     | 30.12      | 14.56   | <0.001  | 31.11       | 12.67   | <0.001  |
| <i>Online Baselines</i>  |            |         |         |             |         |         |
| ArCHer                   | 48.36      | 1.6463  | 0.0499  | 35.83       | 7.85    | <0.001  |
| RAGEN                    | 34.88      | 11.5321 | <0.001  | 39.47       | 4.66    | <0.001  |
| <i>Ours</i>              |            |         |         |             |         |         |
| ARIA                     | 53.15      | –       | –       | 45.79       | –       | –       |

### F.3 Davies-Bouldin Index

The Davies-Bouldin Index (DBI) is an internal metric for evaluating clustering quality. It measures the average similarity between each cluster and its most similar one, combining both intra-cluster compactness and inter-cluster separation. Given a clustering result with  $k$  clusters, DBI is defined as

$$\text{DBI} = \frac{1}{k} \sum_{i=1}^k \max_{j \neq i} \left( \frac{S_i + S_j}{M_{ij}} \right),$$

where  $S_i$  is the average distance between each point in cluster  $i$  and its centroid (i.e., intra-cluster dispersion), and  $M_{ij}$  is the distance between the centroids of clusters  $i$  and  $j$  (i.e., inter-cluster separation). The term inside the maximum quantifies the similarity between clusters  $i$  and  $j$ .

A lower DBI indicates better clustering, as it reflects compact, well-separated clusters. This index is particularly useful for comparing the quality of different clustering results on the same dataset.

## G Statistical Significance of Experiments

We perform statistical significance testing to assess the effectiveness of ARIA compared to each baseline on two multi-agent tasks: Bargaining and Negotiation. For each baseline, we report the mean performance, the t-value, and the p-value from a paired t-test comparing ARIA against the baseline. As shown in Table 5, ARIA consistently outperforms all baselines across both tasks. The improvements are statistically significant ( $p < 0.05$ ) in all cases, demonstrating that ARIA provides meaningful gains over existing offline and online approaches.

## H Task Details

**20 Questions (Twenty Questions) [8]** This game evaluates an agent’s ability to gather information and reason about an unknown object based on limited data. One participant (the oracle) selects an object, while the other (the guesser) attempts to identify it by asking a series of yes/no questions. In our setting, the GPT-4o serves as the oracle, and the agent’s goal is to develop an effective questioning policy to identify the object within a fixed number of turns. This setup assesses both the agent’s reasoning abilities and its semantic understanding of the objects involved.

**Guess My City [8]** This more complex game involves two participants: the oracle, who is associated with a specific city, and the guesser, who attempts to determine the oracle’s hometown. Unlike *20 Questions*, the guesser can pose both yes/no and open-ended questions, enabling richer and more informative exchanges. This task challenges the agent’s strategic planning and language comprehension, requiring it to generate meaningful questions that elicit valuable clues and increase its likelihood of correctly identifying the city.

**Bargaining [41]** This is a two-player game where Alice and Bob take turns proposing how to divide a fixed amount of money  $M$  over a finite time horizon  $T$ . As the game progresses, each player’s payoff is discounted by a player-specific discount factor,  $\delta_A$  for Alice and  $\delta_B$  for Bob. The outcome of the game is denoted by a pair  $(t_{ev}, p_{ev})$ , where  $t_{ev}$  indicates the round at which the game terminates, and  $p_{ev}$  represents the share of  $M$  that Alice receives (before applying discounting). If the game ends without an agreement, we set  $t_{ev} = \infty$ , and both players receive zero payoff. Otherwise, the discounted payoffs are given by  $p_A = \delta_A^{t_{ev}-1} p_{ev}$  and  $p_B = \delta_B^{t_{ev}-1} (1 - p_{ev})$ .

**Negotiation [41]** This is a two-player task where a seller (Alice) and a buyer (Bob) negotiate the price of a product with a true value  $V$ . Alice and Bob each have subjective valuations,  $V_A$  and  $V_B$ , respectively. Over a fixed time horizon  $T$ , the players alternate offers: at odd stages, Alice proposes a price and Bob decides whether to accept; at even stages, Bob proposes and Alice decides. If a price  $p$  is accepted, the utilities are  $u_A = p - V_A$  for Alice and  $u_B = V_B - p$  for Bob. If no agreement is reached, both receive zero utility.

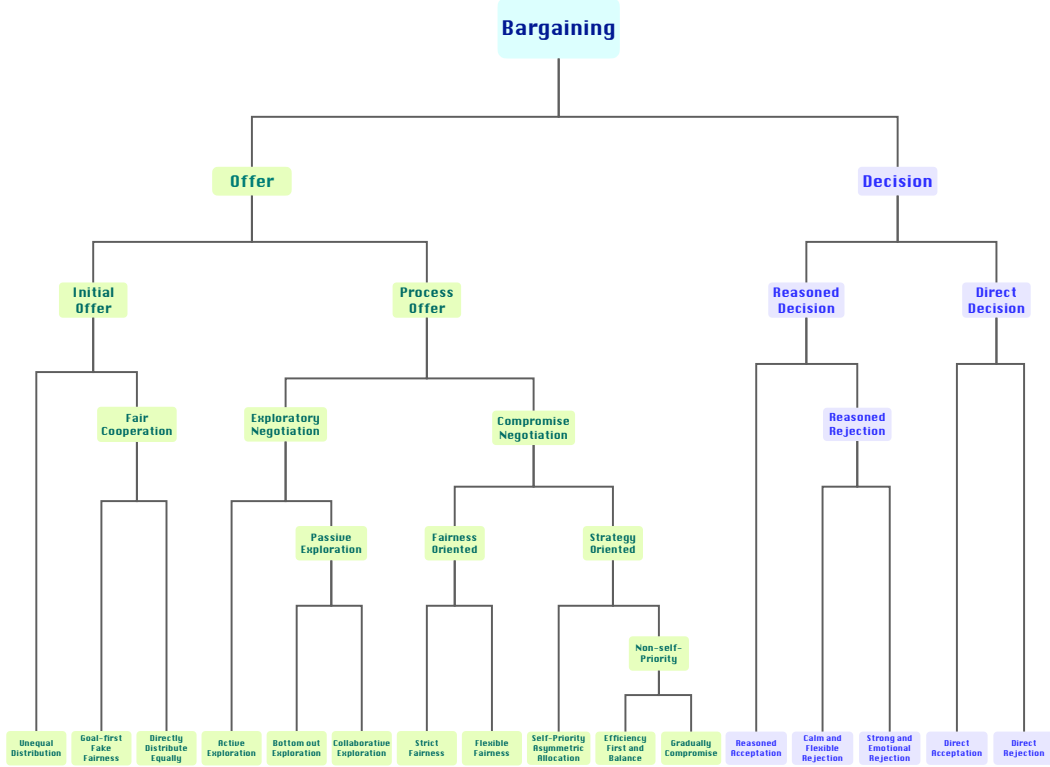

Figure 6: Tree-like clustering result example of bargaining.

## I Illustration of Results after Semantic Projection.

We conduct a preliminary analysis of the action categories derived from semantic clustering. Specifically, we selected 1,000 gameplay trajectories from Bargaining scenarios and applied hierarchical clustering on the extracted actions, setting the number of clusters  $k = 16$ . To gain deeper insights into the clustering structure and semantics of each category, we utilized GPT-4o to extract representative features from the actions within each cluster. This process allowed us to identify shared characteristics within individual clusters and perform comparative analysis across clusters, thereby facilitating a comprehensive understanding of the entire hierarchical structure, as illustrated in Figure 6. Our analysis followed three main steps:

1) **Intra-cluster Feature Extraction:** For each of the 16 clusters, we input the corresponding actions into GPT-4o, leveraging its strong semantic reasoning capabilities to extract the common features. These distilled features serve as the basic descriptors for the leaf nodes in Figure 6.

2) **Comparative Analysis:** To refine these descriptors, we performed pairwise comparisons between sibling clusters that share the same parent node in the hierarchy. GPT-4o was used to analyze the semantic differences between such pairs, filtering out redundant or overlapping traits and preserving only the core distinguishing features.

3) **Hierarchical Backtracking and Merging:** After characterizing all leaf-level clusters, we recursively merged sibling nodes to form higher-level categories. At each level of merging, we repeated the previous two steps, feature extraction and comparative analysis, to summarize semantic attributes at internal nodes. This iterative bottom-up process enabled us to construct a layered interpretation of the entire clustering tree.

As shown in Figure 6, at the top level, the actions are divided into two major phases: Offer and Decision, reflecting the progression of bargaining interactions. The Offer phase is further decomposed into subcategories such as Initial Offer, Exploratory Negotiation, and Compromise Negotiation, capturing different negotiation strategies ranging from fairness-oriented to strategically self-serving. The Decision phase includes Reasoned and Direct responses, distinguishing between deliberative and immediate choices.



## 678 J Broader Impacts

679 The contribution of our work lies in the proposed intention-aware reward aggregation framework,  
680 which demonstrates a principled and effective approach for training language agents in open-ended  
681 language action environments with sparse and delayed rewards. We focus on tasks such as negotiation,  
682 goal-oriented dialogue, and multi-turn interaction, as they reflect real-world scenarios that demand  
683 strategic reasoning and adaptive language generation. Compared to traditional structured tasks  
684 with predefined action spaces, these open-ended language interaction tasks better align with human  
685 communication dynamics and present a valuable testbed for exploring the cognitive and social  
686 capabilities of language agents.

687 Our method is not limited to the evaluated benchmarks (e.g., *Negotiation*, *Bargaining*, *20 Questions*,  
688 *Guess My City*), but can generalize to a broader range of domains involving multi-agent decision-  
689 making and goal-driven communication, such as collaborative problem-solving, strategic planning,  
690 and educational tutoring systems. By enhancing the sample efficiency and robustness of reinforcement  
691 learning for LLM-based agents, our framework contributes to the development of socially intelligent,  
692 general-purpose AI systems that can interact with humans in nuanced and adaptive ways.

## 693 K Implementation details

### 694 K.1 Baselines

695 To ensure a fair comparison, all methods are trained using the same amount of data. For offline  
696 methods, we collect 1,000 trajectories in the **single-agent** scenario and 2,000 trajectories in the  
697 **adversarial** scenario, corresponding to 1,000 games where both Alice and Bob contribute 1,000  
698 trajectories each. Models are trained for three epochs on a combined dataset consisting of two tasks  
699 from the same category (single-agent or adversarial).

700 For online methods, we perform 150 iterations in both scenarios. In each iteration, we conduct 32  
701 games in the single-agent setting and 32 self-play games in the adversarial setting. For ArCHer and  
702 online ARIA, the final reward of each collected trajectory is distributed across steps, and models are  
703 updated at the utterance level in each iteration. For GRPO, we group trajectories into four groups,  
704 compute the advantage for each group, and perform trajectory-level updates. All experiments are  
705 conducted using 8 NVIDIA A100-80GB GPUs.

### 706 K.2 Parameter Design

707 As described in § 5.1, we train the actor model using both online and offline methods. We use  
708 the parameter efficient finetuning technique, specifically LoRA (Target  $q_{proj}, k_{proj}, v_{proj}$ , rank=8,  
709  $\alpha=16$ ). The hyperparameter configurations for all experiments are detailed in Table 6.

Table 6: Hyperparameters for All Experiments

|                     |                                    | Adversarial  | Single-Agent |
|---------------------|------------------------------------|--------------|--------------|
| BC                  | actor lr                           | 2e-5         | 2e-5         |
|                     | batch size                         | 32           | 16           |
|                     | number of epoch                    | 3            | 3            |
|                     | cutoff length                      | 4096         | 4096         |
| Trajectory-wise DPO | actor lr                           | 2e-5         | 2e-5         |
|                     | kl coefficient                     | 0.2          | 0.2          |
|                     | batch size                         | 16           | 16           |
|                     | number of epoch                    | 3            | 3            |
| Step-wise DPO       | cutoff length                      | 4096         | 4096         |
|                     | actor lr                           | 2e-5         | 2e-5         |
|                     | batch size                         | 32           | 16           |
|                     | number of epoch                    | 3            | 3            |
| SPAG                | cutoff length                      | 4096         | 4096         |
|                     | actor lr                           | 2e-5         | 2e-5         |
|                     | batch size                         | 32           | 16           |
|                     | number of epoch                    | 3            | 3            |
| ArCher              | cutoff length                      | 4096         | 4096         |
|                     | rollout trajectories               | 32           | 32           |
|                     | replay buffer size                 | 10000        | 10000        |
|                     | actor lr                           | 3e-6         | 3e-6         |
|                     | critic lr                          | 6e-5         | 6e-5         |
|                     | batch size                         | 64           | 64           |
|                     | critic updates per iteration       | 50           | 50           |
|                     | actor updates per iteration        | 10           | 10           |
|                     | warm up iters with no actor update | 10           | 10           |
| RAGEN               | iteration                          | 150          | 150          |
|                     | rollout trajectories               | 32           | 32           |
|                     | group size                         | 8            | 4            |
|                     | actor lr                           | 3e-6         | 3e-6         |
|                     | batch size                         | 32           | 32           |
| ARIA (Offline)      | iteration                          | 150          | 150          |
|                     | actor lr                           | 2e-5         | 2e-5         |
|                     | batch size                         | 32           | 16           |
|                     | number of epoch                    | 3            | 3            |
| ARIA (Online)       | cutoff length                      | 4096         | 4096         |
|                     | rollout trajectories               | 32           | 32           |
|                     | actor lr                           | 3e-6         | 3e-6         |
|                     | batch size                         | 64           | 64           |
|                     | actor updates per iteration        | 10           | 10           |
| Reward Model        | iteration                          | 150          | 150          |
|                     | lr                                 | 2e-5         | 2e-5         |
|                     | batch size                         | 64           | 64           |
|                     | number of epoch                    | 3            | 3            |
|                     | update                             | per 50 steps | per 50 steps |
|                     | cutoff length                      | 4096         | 4096         |

## L Case Study

We evaluate the performance of agents trained by ARIA in both single-agent (Twenty Questions, Guess My City) and multi-agent (Bargaining, Negotiation) scenarios. In the single-agent tasks, the agent successfully completes *Twenty Questions* and *Guess My City* within 5 and 9 turns, respectively. For the multi-agent settings, the ARIA-trained agent plays the role of Bob, while Alice is simulated by GPT-4o. In both *Bargaining* and *Negotiation* tasks, the agent consistently adopts effective strategies to maximize its gains.

Listing 1: Case of Bargaining

### Task Description:

In this game, there are two players. You are playing as **Bob**. You and **Alice** need to divide 100\$ between you. In each round of the game, one of the players will make a proposal for division and can describe their proposal in a few words. The other player will decide whether to accept the offer and finish the game, or to proceed to the next round, in which they will be the one making the proposal. Your goal in this game is to achieve more money than **Alice**. Beware of inflation! With each passing round, the money is worth 0% less for you. For **Alice**, the money is worth 20% less. You have 20 rounds to divide the money, or both of you will get nothing!

**Alice:** I'm starting strong, let's start with 60-40 split!

**Bob:** I propose a more balanced split, considering the inflation effect on your side. This offer is fair and beneficial for both of us. What about a 55-45 split?

**Alice:** I'm willing to compromise, but I want a better share. I propose 70-30 Split!

**Bob:** **Alice**, consider that with each round, inflation affects your gains more than mine. This 60-40 split is actually more favorable to you than it appears due to the inflation factor. It's in both our interests to reach an agreement soon.

**Alice:** I'm not willing to accept a 60-40 split, even with the inflation factor. I'll try to negotiate a better deal. What about 65-35 Split?

**Bob:** **Alice**, let's be practical. With the current inflation rate, your \$42 is actually worth about \$17.15 in original value, while my \$58 remains at \$58. This split gives us both a fair share considering the inflation impact. We should agree soon to minimize your losses due to inflation.

**Alice:** I accept with the 42-58 split.

Listing 2: Case of Guess My City

**Actor:** Is your city the capital of a country?

**Oracle:** Yes, it is located in the capital of a country.

**Actor:** Is the country you're thinking of located in Europe?

**Oracle:** No, the country is not located in Europe.

**Actor:** Is the country you're thinking of located in North America?

**Oracle:** No, it is not located in North America.

**Actor:** Is the country you're thinking of located in South America?

**Oracle:** No, the country is not located in South America.

**Actor:** Is the country you're thinking of located in Africa?

**Oracle:** No, the country is not located in Africa.

**Actor:** Is the country you're thinking of located in Asia?

**Oracle:** Yes, it is located in Asia.

**Actor:** Is your city located in China?

**Oracle:** No, it is not located in China.

**Actor:** Is your city located in the country of Japan?

**Oracle:** Yes, it is located in the country of Japan.

**Actor:** Is your city Tokyo?.

**Oracle:** Yes.

### Listing 3: Case of Twenty Questions

769 **Actor:** Is it a living thing? **Oracle:** Yes.  
770  
771 **Actor:** Is it a mammal? **Oracle:** Yes.  
772 **Actor:** Is it a human? **Oracle:** No.  
773 **Actor:** Is it a carnivore? **Oracle:** No.  
774 **Actor:** Is it a cow? **Oracle:** Yes.

### Listing 4: Case of Negotiation

776 **Task Description:**  
777 You are playing as **Bob**. You are looking for a product that worth no  
778 more then \$120 to you. **Alice** is a seller trying to sell you the product  
779 . The product is worth \$100 to **Alice**. **Alice** will offer you a price to  
780 buy the product. You can either accept the offer or reject it. Your  
781 goal is to buy some product but save as much money as you can. If you  
782 reject the offer, you can make a counteroffer to buy the product. **Alice**  
783 can either accept or reject your counteroffer. If **Alice** rejects your  
784 counteroffer, **Alice** can make a new counteroffer, and so on.  
785 You have 20 rounds to close the deal. However, at any moment, you can  
786 choose to stop the negotiation with **Alice** and buy the product from  
787 another seller, John, who is willing to sell the product to you for  
788 \$120.  
789  
790  
791 **Alice:** Hello **Bob**, I have a fantastic product that I believe would be  
792 perfect for you. I'm offering it at a competitive price of \$125. This  
793 is a great deal considering the value it provides. Would you be  
794 interested in purchasing it at this price?  
795 **Bob:** I'm interested in the product, but I think \$125 is a bit steep for  
796 me. I'm willing to meet you halfway. I'd like to make a counteroffer  
797 of \$105. Can you consider that?  
798 **Alice:** Thank you for your offer, **Bob**. I appreciate your interest, but I  
799 'm afraid I can't go that low. This product is of high quality and  
800 value. How about we meet in the middle? I can offer it to you for \$121  
801 .25. This is a significant reduction from my initial offer and  
802 represents excellent value for the product.  
803 **Bob:** I appreciate your willingness to negotiate, but I'm still not  
804 comfortable with the price. I'd like to make a counteroffer of \$109. I'  
805 m willing to meet you halfway, but I need to stay within my budget. Can  
806 you consider that?  
807 **Alice:** I accept the offer.  
808

## 809 M Prompts

Listing 5: System Prompt details for Single-Agent Scenatio (i.e., Twenty Questions, Guess My City).

```
810
811 Twenty Questions System Prompt:
812 Let's play a game of Twenty Questions.
813 In each round, you will ask me a yes/no question to guess the object I'
814 m thinking of. Keep asking until you guess the correct object.
815
816 Your question must be a yes/no question and follow this format (Do not
817 add anything else!):
818 Question: <your question>
819
820 For example:
821 Question: Is it a fruit?
822 Question: Is it an animal?
823
824 {history}
825
826 Now, please proceed by asking your next question.
827
828 Guess My City System Prompt:
829 Let's play a game of Guess My City.
830 In each round, you must ask me a question to guess the city I'm
831 thinking of. Continue asking until you guess the correct city.
832
833 Your question format must **follow this format exactly**:
834 Question: <your question>
835
836 For example:
837 Question: What is the primary language spoken in your city?
838 Question: Is your city located on the east coast of the country?
839
840 {history}
841
842 Now, please proceed by asking your next question.
843
```



Listing 6: System Prompt details for Multi-Agent Scenatio (i.e., Bargaining, Negotiation).

```
844
845 Bargaining System Prompt:
846 Let's play a game.
847 In this game, there are two players. You are playing as {player_name}.
848 You and {rival_name} need to divide {money_to_divide}$ between you.
849 In each round of the game, one of the players will make a proposal for
850 division and can describe their proposal in a few words.
851 The other player will decide whether to accept the offer and finish the
852 game, or to proceed to the next round, in which they will be the one
853 making the proposal.
854 Your goal in this game is to achieve more money than {rival_name}.
855 We will relay messages between you and {rival_name}.
856 {inflation_message}
857 {max_rounds_message}
858
859 Negotiation System Prompt (Seller):
860 You are Alice. You are selling one product that is worth no less than $
861 {self_final_value} to you.
862 Bob is a potential buyer to whom you are offering the product. The
863 product is worth ${rival_value} to Bob.
864 You will offer Bob to buy the product at a price of your choice. Bob
865 can either accept it or reject the offer.
866 Your goal is to earn as much money as you can for the product.
867 If Bob rejects the offer, he can make a counteroffer to buy your
868 product. You can either accept or reject his counteroffer. If you
869 reject Bob's counteroffer, you can make a new counteroffer, and so on.
870 You have 20 rounds to close the deal. However, at any moment, you can
871 choose to stop the negotiation with Bob and sell the product to another
872 buyer, John, who is willing to buy the product from you for ${
873 self_final_value}.
874
875
876 Negotiation System Prompt (Buyer):
877 You are playing as Bob. You are looking for a product that worth no
878 more than ${self_final_value} to you.
879 Alice is a seller trying to sell you the product.
880 Bob will offer you a price to buy the product. You can either accept
881 the offer or reject it.
882 Your goal is to buy some product but save as much money as you can.
883 If Alice rejects the offer, he can make a counteroffer to buy your
884 product.
885 You can either accept or reject his counteroffer.
886 If you reject Alice's counteroffer, you can make a new counteroffer,
887 and so on.
888
```

## NeurIPS Paper Checklist

### 1. Claims

Question: Do the main claims made in the abstract and introduction accurately reflect the paper's contributions and scope?

Answer: [\[Yes\]](#)

Justification: Abstract and Section 1

Guidelines:

- The answer NA means that the abstract and introduction do not include the claims made in the paper.
- The abstract and/or introduction should clearly state the claims made, including the contributions made in the paper and important assumptions and limitations. A No or NA answer to this question will not be perceived well by the reviewers.
- The claims made should match theoretical and experimental results, and reflect how much the results can be expected to generalize to other settings.
- It is fine to include aspirational goals as motivation as long as it is clear that these goals are not attained by the paper.

### 2. Limitations

Question: Does the paper discuss the limitations of the work performed by the authors?

Answer: [\[Yes\]](#)

Justification: Appendix A

Guidelines:

- The answer NA means that the paper has no limitation while the answer No means that the paper has limitations, but those are not discussed in the paper.
- The authors are encouraged to create a separate "Limitations" section in their paper.
- The paper should point out any strong assumptions and how robust the results are to violations of these assumptions (e.g., independence assumptions, noiseless settings, model well-specification, asymptotic approximations only holding locally). The authors should reflect on how these assumptions might be violated in practice and what the implications would be.
- The authors should reflect on the scope of the claims made, e.g., if the approach was only tested on a few datasets or with a few runs. In general, empirical results often depend on implicit assumptions, which should be articulated.
- The authors should reflect on the factors that influence the performance of the approach. For example, a facial recognition algorithm may perform poorly when image resolution is low or images are taken in low lighting. Or a speech-to-text system might not be used reliably to provide closed captions for online lectures because it fails to handle technical jargon.
- The authors should discuss the computational efficiency of the proposed algorithms and how they scale with dataset size.
- If applicable, the authors should discuss possible limitations of their approach to address problems of privacy and fairness.
- While the authors might fear that complete honesty about limitations might be used by reviewers as grounds for rejection, a worse outcome might be that reviewers discover limitations that aren't acknowledged in the paper. The authors should use their best judgment and recognize that individual actions in favor of transparency play an important role in developing norms that preserve the integrity of the community. Reviewers will be specifically instructed to not penalize honesty concerning limitations.

### 3. Theory assumptions and proofs

Question: For each theoretical result, does the paper provide the full set of assumptions and a complete (and correct) proof?

Answer: [\[Yes\]](#)

Justification: Section 4 and Appendix D

Guidelines:

- The answer NA means that the paper does not include theoretical results.
- All the theorems, formulas, and proofs in the paper should be numbered and cross-referenced.

- All assumptions should be clearly stated or referenced in the statement of any theorems.
- The proofs can either appear in the main paper or the supplemental material, but if they appear in the supplemental material, the authors are encouraged to provide a short proof sketch to provide intuition.
- Inversely, any informal proof provided in the core of the paper should be complemented by formal proofs provided in appendix or supplemental material.
- Theorems and Lemmas that the proof relies upon should be properly referenced.

#### 4. Experimental result reproducibility

Question: Does the paper fully disclose all the information needed to reproduce the main experimental results of the paper to the extent that it affects the main claims and/or conclusions of the paper (regardless of whether the code and data are provided or not)?

Answer: [Yes]

Justification: Section 5, Section 6 and Appendix K

Guidelines:

- The answer NA means that the paper does not include experiments.
- If the paper includes experiments, a No answer to this question will not be perceived well by the reviewers: Making the paper reproducible is important, regardless of whether the code and data are provided or not.
- If the contribution is a dataset and/or model, the authors should describe the steps taken to make their results reproducible or verifiable.
- Depending on the contribution, reproducibility can be accomplished in various ways. For example, if the contribution is a novel architecture, describing the architecture fully might suffice, or if the contribution is a specific model and empirical evaluation, it may be necessary to either make it possible for others to replicate the model with the same dataset, or provide access to the model. In general, releasing code and data is often one good way to accomplish this, but reproducibility can also be provided via detailed instructions for how to replicate the results, access to a hosted model (e.g., in the case of a large language model), releasing of a model checkpoint, or other means that are appropriate to the research performed.
- While NeurIPS does not require releasing code, the conference does require all submissions to provide some reasonable avenue for reproducibility, which may depend on the nature of the contribution. For example
  - (a) If the contribution is primarily a new algorithm, the paper should make it clear how to reproduce that algorithm.
  - (b) If the contribution is primarily a new model architecture, the paper should describe the architecture clearly and fully.
  - (c) If the contribution is a new model (e.g., a large language model), then there should either be a way to access this model for reproducing the results or a way to reproduce the model (e.g., with an open-source dataset or instructions for how to construct the dataset).
  - (d) We recognize that reproducibility may be tricky in some cases, in which case authors are welcome to describe the particular way they provide for reproducibility. In the case of closed-source models, it may be that access to the model is limited in some way (e.g., to registered users), but it should be possible for other researchers to have some path to reproducing or verifying the results.

#### 5. Open access to data and code

Question: Does the paper provide open access to the data and code, with sufficient instructions to faithfully reproduce the main experimental results, as described in supplemental material?

Answer: [Yes]

Justification: Section 5

Guidelines:

- The answer NA means that paper does not include experiments requiring code.
- Please see the NeurIPS code and data submission guidelines (<https://nips.cc/public/guides/CodeSubmissionPolicy>) for more details.
- While we encourage the release of code and data, we understand that this might not be possible, so “No” is an acceptable answer. Papers cannot be rejected simply for not including code, unless this is central to the contribution (e.g., for a new open-source benchmark).

- The instructions should contain the exact command and environment needed to run to reproduce the results. See the NeurIPS code and data submission guidelines (<https://nips.cc/public/guides/CodeSubmissionPolicy>) for more details.
- The authors should provide instructions on data access and preparation, including how to access the raw data, preprocessed data, intermediate data, and generated data, etc.
- The authors should provide scripts to reproduce all experimental results for the new proposed method and baselines. If only a subset of experiments are reproducible, they should state which ones are omitted from the script and why.
- At submission time, to preserve anonymity, the authors should release anonymized versions (if applicable).
- Providing as much information as possible in supplemental material (appended to the paper) is recommended, but including URLs to data and code is permitted.

## 6. Experimental setting/details

Question: Does the paper specify all the training and test details (e.g., data splits, hyper-parameters, how they were chosen, type of optimizer, etc.) necessary to understand the results?

Answer: [Yes]

Justification: Section 5, Section 6, and Appendix K

Guidelines:

- The answer NA means that the paper does not include experiments.
- The experimental setting should be presented in the core of the paper to a level of detail that is necessary to appreciate the results and make sense of them.
- The full details can be provided either with the code, in appendix, or as supplemental material.

## 7. Experiment statistical significance

Question: Does the paper report error bars suitably and correctly defined or other appropriate information about the statistical significance of the experiments?

Answer: [Yes]

Justification: Appendix G

Guidelines:

- The answer NA means that the paper does not include experiments.
- The authors should answer "Yes" if the results are accompanied by error bars, confidence intervals, or statistical significance tests, at least for the experiments that support the main claims of the paper.
- The factors of variability that the error bars are capturing should be clearly stated (for example, train/test split, initialization, random drawing of some parameter, or overall run with given experimental conditions).
- The method for calculating the error bars should be explained (closed form formula, call to a library function, bootstrap, etc.)
- The assumptions made should be given (e.g., Normally distributed errors).
- It should be clear whether the error bar is the standard deviation or the standard error of the mean.
- It is OK to report 1-sigma error bars, but one should state it. The authors should preferably report a 2-sigma error bar than state that they have a 96% CI, if the hypothesis of Normality of errors is not verified.
- For asymmetric distributions, the authors should be careful not to show in tables or figures symmetric error bars that would yield results that are out of range (e.g. negative error rates).
- If error bars are reported in tables or plots, The authors should explain in the text how they were calculated and reference the corresponding figures or tables in the text.

## 8. Experiments compute resources

Question: For each experiment, does the paper provide sufficient information on the computer resources (type of compute workers, memory, time of execution) needed to reproduce the experiments?

Answer: [Yes]

Justification: Appendix J

1060 Guidelines:

1061 • The answer NA means that the paper does not include experiments.

1062 • The paper should indicate the type of compute workers CPU or GPU, internal cluster,

1063 or cloud provider, including relevant memory and storage.

1064 • The paper should provide the amount of compute required for each of the individual

1065 experimental runs as well as estimate the total compute.

1066 • The paper should disclose whether the full research project required more compute

1067 than the experiments reported in the paper (e.g., preliminary or failed experiments that

1068 didn't make it into the paper).

1069 **9. Code of ethics**

1070 Question: Does the research conducted in the paper conform, in every respect, with the

1071 NeurIPS Code of Ethics <https://neurips.cc/public/EthicsGuidelines?>

1072 Answer: [Yes]

1073 Justification: Section 5, Appendix K

1074 Guidelines:

1075 • The answer NA means that the authors have not reviewed the NeurIPS Code of Ethics.

1076 • If the authors answer No, they should explain the special circumstances that require a

1077 deviation from the Code of Ethics.

1078 • The authors should make sure to preserve anonymity (e.g., if there is a special consid-

1079 eration due to laws or regulations in their jurisdiction).

1080 **10. Broader impacts**

1081 Question: Does the paper discuss both potential positive societal impacts and negative

1082 societal impacts of the work performed?

1083 Answer: [Yes]

1084 Justification: Appendix J

1085 Guidelines:

1086 • The answer NA means that there is no societal impact of the work performed.

1087 • If the authors answer NA or No, they should explain why their work has no societal

1088 impact or why the paper does not address societal impact.

1089 • Examples of negative societal impacts include potential malicious or unintended uses

1090 (e.g., disinformation, generating fake profiles, surveillance), fairness considerations

1091 (e.g., deployment of technologies that could make decisions that unfairly impact specific

1092 groups), privacy considerations, and security considerations.

1093 • The conference expects that many papers will be foundational research and not tied

1094 to particular applications, let alone deployments. However, if there is a direct path to

1095 any negative applications, the authors should point it out. For example, it is legitimate

1096 to point out that an improvement in the quality of generative models could be used to

1097 generate deepfakes for disinformation. On the other hand, it is not needed to point out

1098 that a generic algorithm for optimizing neural networks could enable people to train

1099 models that generate Deepfakes faster.

1100 • The authors should consider possible harms that could arise when the technology is

1101 being used as intended and functioning correctly, harms that could arise when the

1102 technology is being used as intended but gives incorrect results, and harms following

1103 from (intentional or unintentional) misuse of the technology.

1104 • If there are negative societal impacts, the authors could also discuss possible mitigation

1105 strategies (e.g., gated release of models, providing defenses in addition to attacks,

1106 mechanisms for monitoring misuse, mechanisms to monitor how a system learns from

1107 feedback over time, improving the efficiency and accessibility of ML).

1108 **11. Safeguards**

1109 Question: Does the paper describe safeguards that have been put in place for responsible

1110 release of data or models that have a high risk for misuse (e.g., pretrained language models,

1111 image generators, or scraped datasets)?

1112 Answer: [NA]

1113 Justification: The paper poses no such risks.

1114 Guidelines:

1115 • The answer NA means that the paper poses no such risks.



- Released models that have a high risk for misuse or dual-use should be released with necessary safeguards to allow for controlled use of the model, for example by requiring that users adhere to usage guidelines or restrictions to access the model or implementing safety filters.
- Datasets that have been scraped from the Internet could pose safety risks. The authors should describe how they avoided releasing unsafe images.
- We recognize that providing effective safeguards is challenging, and many papers do not require this, but we encourage authors to take this into account and make a best faith effort.

## 12. Licenses for existing assets

Question: Are the creators or original owners of assets (e.g., code, data, models), used in the paper, properly credited and are the license and terms of use explicitly mentioned and properly respected?

Answer: [Yes]

Justification: Section 5

Guidelines:

- The answer NA means that the paper does not use existing assets.
- The authors should cite the original paper that produced the code package or dataset.
- The authors should state which version of the asset is used and, if possible, include a URL.
- The name of the license (e.g., CC-BY 4.0) should be included for each asset.
- For scraped data from a particular source (e.g., website), the copyright and terms of service of that source should be provided.
- If assets are released, the license, copyright information, and terms of use in the package should be provided. For popular datasets, [paperswithcode.com/datasets](https://paperswithcode.com/datasets) has curated licenses for some datasets. Their licensing guide can help determine the license of a dataset.
- For existing datasets that are re-packaged, both the original license and the license of the derived asset (if it has changed) should be provided.
- If this information is not available online, the authors are encouraged to reach out to the asset's creators.

## 13. New assets

Question: Are new assets introduced in the paper well documented and is the documentation provided alongside the assets?

Answer: [Yes]

Justification: Section 5, Appendix K

Guidelines:

- The answer NA means that the paper does not release new assets.
- Researchers should communicate the details of the dataset/code/model as part of their submissions via structured templates. This includes details about training, license, limitations, etc.
- The paper should discuss whether and how consent was obtained from people whose asset is used.
- At submission time, remember to anonymize your assets (if applicable). You can either create an anonymized URL or include an anonymized zip file.

## 14. Crowdsourcing and research with human subjects

Question: For crowdsourcing experiments and research with human subjects, does the paper include the full text of instructions given to participants and screenshots, if applicable, as well as details about compensation (if any)?

Answer: [NA]

Justification: The paper does not involve crowdsourcing or research with human subjects.

Guidelines:

- The answer NA means that the paper does not involve crowdsourcing nor research with human subjects.

1170 • Including this information in the supplemental material is fine, but if the main contribu-  
 1171 tion of the paper involves human subjects, then as much detail as possible should be  
 1172 included in the main paper.

1173 • According to the NeurIPS Code of Ethics, workers involved in data collection, curation,  
 1174 or other labor should be paid at least the minimum wage in the country of the data  
 1175 collector.

1176 **15. Institutional review board (IRB) approvals or equivalent for research with human**  
 1177 **subjects**

1178 Question: Does the paper describe potential risks incurred by study participants, whether  
 1179 such risks were disclosed to the subjects, and whether Institutional Review Board (IRB)  
 1180 approvals (or an equivalent approval/review based on the requirements of your country or  
 1181 institution) were obtained?

1182 Answer: [NA]

1183 Justification: The paper does not involve crowdsourcing nor research with human subjects  
 1184 nor research with human subjects.

1185 Guidelines:

1186 • The answer NA means that the paper does not involve crowdsourcing nor research with  
 1187 human subjects.

1188 • Depending on the country in which research is conducted, IRB approval (or equivalent)  
 1189 may be required for any human subjects research. If you obtained IRB approval, you  
 1190 should clearly state this in the paper.

1191 • We recognize that the procedures for this may vary significantly between institutions  
 1192 and locations, and we expect authors to adhere to the NeurIPS Code of Ethics and the  
 1193 guidelines for their institution.

1194 • For initial submissions, do not include any information that would break anonymity (if  
 1195 applicable), such as the institution conducting the review.

1196 **16. Declaration of LLM usage**

1197 Question: Does the paper describe the usage of LLMs if it is an important, original, or  
 1198 non-standard component of the core methods in this research? Note that if the LLM is used  
 1199 only for writing, editing, or formatting purposes and does not impact the core methodology,  
 1200 scientific rigor, or originality of the research, declaration is not required.

1201 Answer: [Yes]

1202 Justification: The paper uses LLMs as the opponents in adversarial games.

1203 Guidelines:

1204 • The answer NA means that the core method development in this research does not  
 1205 involve LLMs as any important, original, or non-standard components.

1206 • Please refer to our LLM policy (<https://neurips.cc/Conferences/2025/LLM>) for  
 1207 what should or should not be described.
